# Supplementary material for: BT8009; A Nectin-4 Targeting Bicycle Toxin Conjugate for Treatment of Solid Tumors
Source: PubMed Central journal article supplement — Mol Cancer Ther. 2022 Sep 16;21(12):1747–56. doi: 10.1158/1535-7163.MCT-21-0875 (PMC9940631; doi:10.1158/1535-7163.mct-21-0875), 2022-09-16
Supplement: mct-21-0875_supplementary_abbreviations_and_methods_suppsam.pdf [file mct-21-0875_supplementary_abbreviations_and_methods_suppsam.pdf]

## **BT8009; a Nectin-4 targeting *Bicycle*<sup>®</sup> Toxin Conjugate for treatment of solid tumors.**

**Authors;** Michael Rigby\*, Gavin Bennett\*, Lihong Chen\*, Gemma E. Mudd\*, Helen E. Harrison\*, Paul J. Beswick\*, Katerine N. Van Rietschoten\*, Sophie M. Watcham\*, Heather S. Scott\*, Amy Brown\*, Peter U. Park†, Carly Campbell†, Eric Haines, Johanna Lahdenranta†, Michael J Skynner\*, Phil Jeffrey\*, Nicholas Keen† and Kevin Lee\*

### **Supplementary abbreviations and methods**

#### **Abbreviations:**

ADC=Antibody Drug Conjugate

biw=twice a week

BTC=Bicycle Toxin Conjugate

CDX=Cell Derived Xenograft

FACS=Fluorescence Activated Cell Sorting

IHC=Immunohistochemistry

iv=intravenous

LLOQ=Lower limit of quantification

NCE=New Chemical Entity

PDX=Patient Derived Xenograft

qw=once a week

q2w=once every second week

SD=Standard Deviation

SEM=Standard Error of the Mean

ULOQ=Upper limit of quantification

## Methods

### Synthesis of a Nectin-4 binding antibody drug conjugate

The Nectin-4 ADC comprises an Nectin-4 binding antibody conjugated to the cytotoxin MMAE. 1C1 antibody was produced using standard methods by Genscript (Piscataway, NJ, USA), based on the coding sequence for enfortumab provided in WHO Drug Information, Vol. 28, No. 1, 2014 Recommended INN (International Nonproprietary Names for Pharmaceutical Substances): List 71. Recombinant plasmids encoding enfortumab were transiently co-transfected into Expi293F cells in culture. Supernatants were collected and purified on an affinity purification column, after washing and elution fractions were pooled, and buffer exchanged to the final formulation buffer. Purified protein was analyzed by SDS-PAGE, Western blot and SEC-HPLC for molecular weight and purity. Analysis indicated a single antibody species, consistent with the description of enfortumab/ASG-22M6, with high purity and low endotoxin levels.

Conjugation to vedotin was performed at WuXi AppTec (Shanghai, China) via cysteine conjugation with MC-VC-PAB MMAE. This provided an ADC with a molecular weight of 152 kDa and a DAR of 3.98:1

### Nectin-4 Surface Plasmon Resonance (SPR) Assays

Cloning: Human Nectin-4 (residues 32-349) or Rat Nectin-4 (residues 31-347) or cynomolgus Nectin-4 (residues 32-349) or Dog Nectin-4 (residues 31-348) with a gp67 signal sequence and C-terminal FLAG tag was cloned into pFastbac-1 and baculovirus made using standard Bac-to-Bac™ protocols (Life Technologies). Mouse Nectin-4 was purchased from R&D Systems cat# 3116-N4

Biotinylation: Protein was randomly biotinylated using EZ-Link™ Sulfo-NHS-LC-LC-Biotin reagent (Thermo Fisher) as per the manufacturer's suggested protocol. The protein was extensively desalted to remove uncoupled biotin using spin columns and transferred to PBS.

Affinity determination: Streptavidin was immobilized on a CM5 (GE Healthcare) or CMD5000 (Xantec) chip using standard amine-coupling chemistry at 25°C with HBS-N (10 mM HEPES, 0.15 M NaCl, pH 7.4) as the running buffer. Briefly, the carboxymethyl dextran surface was activated with a 7 min injection of a 1:1 ratio of 0.4 M 1-ethyl-3-(3-dimethylaminopropyl) carbodiimide hydrochloride (EDC)/0.1 M N-hydroxy succinimide (NHS) at a flow rate of 10 µl/min. Streptavidin was diluted to 0.2 mg/ml in 10 mM sodium acetate (pH 4.5) and captured by injecting 120µl onto the activated chip surface. Residual activated groups were blocked with a 7 min injection of 1 Methanolamine (pH 8.5) and biotinylated Nectin-4 captured to a level of 1,200-1,800 RU. Bicycles and BTCs were prepared in PBS/0.05% Tween 20 with a final DMSO concentration of 0.5%. SPR analysis was run on a Biacore 3000 instrument at 25°C at a flow rate of 50µl/min with association time of 60 seconds and dissociation time of between 400 and 1,200 seconds depending upon the individual peptide. Data were corrected for DMSO excluded volume

effects. All data were double referenced for blank injections and reference surface using standard processing procedures and data processing and kinetic fitting were performed using Scrubber software, version 2.0 (BioLogic Software). Data were fitted using simple 1:1 binding model allowing for mass transport effects where appropriate. SPR assays were performed at Charles Rivers Laboratories, Sandwich, UK.

### **Quantification of Nectin-4 Expression on CDX Cell Lines**

All work was carried out at WuXi Apptec (Shanghai, China). Nectin-4 binding sites were quantified using flow cytometry (FACS). Briefly, cells at  $10^6$  per mL were incubated in staining buffer at  $4^{\circ}\text{C}$  with a live/dead stain (Invitrogen L10120,  $1\mu\text{L}$  per  $10^6$  cells) and anti-human Nectin-4 antibody (R&D Systems, FAB3659P,  $10\mu\text{L}$  per  $10^6$  cells) or the isotype control (IgG2B, R&D Systems, IC0041,  $10\mu\text{L}$  per  $10^6$  cells), conjugated with phycoerythrin (PE), for 30 minutes, protected from light at  $4^{\circ}\text{C}$ . Cells were washed twice, resuspended in  $100\mu\text{L}$  and analyzed on an Intellicyt iQue screener or BD FACS Canto II. Data were analyzed using Forecyt software. Cells were gated for viability using fluorescence intensity at 405/445nm. Mean fluorescence intensity of PE (488/572nm) for single live cells was determined and compared to known standard QuantiBRITE beads (BD #340495) to determine the number of antibody binding sites by linear regression. The antibody binding sites for the isotype control was subtracted from that obtained for Nectin-4. QuantiBRITE beads were used as per manufacturer's instructions and made up in staining buffer. Beads contain between 474 and 62336 molecules PE per bead. If the total number of antibody binding sites was determined to be below 474, <LLOQ was quoted.

### **Quantification of Nectin-4 Expression on PDX Cell Lines**

All work was carried out at WuXi Apptec (Shanghai, China). Single cell suspensions derived from xenograft models were obtained from tumor tissue via mechanical cutting and enzymatic digestion with Accumax, before purification by density gradient centrifugation with Histopaque. Cells ( $10^6$  per mL) were stained in staining buffer (PBS + 2% BSA) at  $4^{\circ}\text{C}$ . Briefly, rat anti-mouse CD16/CD32 (BD, #553141,  $1\mu\text{g}$  per  $10^6$  cells) was added to cells for 15 minutes at  $4^{\circ}\text{C}$ , to reduce non-specific binding. Cells were then incubated with live/dead stain (Invitrogen, #L10120,  $1\mu\text{L}$  per  $10^6$  cells) and rat anti-mouse CD45 (BD, #560510,  $1\mu\text{g}$  per  $5 \times 10^6$  cells) conjugated to Alexa Fluor<sup>®</sup> 700 to allow exclusion of mouse derived cells from analysis. Finally, phycoerythrin (PE) conjugated anti-human Nectin-4 (R&D Systems, FAB2659P) or the isotype control (IgG2B, R&D Systems, IC0041P) were added at  $10\mu\text{L}$  per  $10^6$  cells for 30 minutes, protected from light at  $4^{\circ}\text{C}$ . Cells were washed twice in staining buffer, resuspended in  $100\mu\text{L}$  staining buffer and analyzed immediately on an Intellicyt iQue screener or BD FACS Canto II. Data were analyzed using Forecyt software. Cells were gated for viability using fluorescence intensity at 405/445nm. Mean fluorescence intensity of PE (488/572nm) for single live cells which stained negative for mouse CD45 (640/675nm) was determined and compared to known standard QuantiBRITE beads (BD) to determine the number of antibody binding sites by linear regression. The calculated value of

antibody binding sites for the isotype control was subtracted from that obtained for Nectin-4. QuantiBRITE beads were used as per manufacturer's instructions and made up in PBS + 2% BSA. Beads contain between 474 and 62336 molecules PE per bead. If the total number of antibody binding sites was determined to be outside of this range, then LLOQ (lower limit of quantitation) or ULOQ (upper limit of quantitation) was quoted as appropriate.

### **Immunohistochemical detection of Nectin-4 Expression on Tumor Xenografts**

Anti-Nectin-4 antibody (ab192033, abcam) was used on 4-6  $\mu\text{m}$  FFPE sections in conjunction with either the Dako 48 staining platform using Dako FLEX detection kit, or the LeicabondRX platform with Polymer HRP and DAB detection. All sections were counterstained with Hematoxylin. Immunohistochemistry was performed at NovaVita Histopath Laboratory LLC (Boston, MA, USA) and WuXiAppTec (Shanghai, China).

### **BT8009, enfortumab vedotin or MMAE binding to MDA-MB-468 cells**

All work was carried out at WuXi Apptec (Shanghai, China).

MDA-MB-468 cells were seeded in 96 well plates at  $2 \times 10^4$  cells/well and incubated at  $37^\circ\text{C}$  overnight. All cell staining was performed in ice cold Minimum Essential Medium Eagle (MEM) (Invitrogen, #51200038) at  $4^\circ\text{C}$ . Cells were rinsed in ice cold MEM between all reagent additions, unless stated otherwise. Cells were treated in duplicate wells, with an absence or presence of increasing concentrations of compound (BT8009, Nectin-4 ADC or free MMAE) (0.15nM -10 $\mu\text{M}$ ) for 45 minutes on ice, followed by  $5\mu\text{g}/\text{mL}$  anti-MMAE antibody (Mouse Anti-MMAE/F monoclonal antibody (C12A1), Levena Biopharma, LEV-MAF3-500) in MEM solution for 30 minutes. Secondary antibody ( $4\mu\text{g}/\text{mL}$  anti-mouse IgG conjugated with Alexa Fluor<sup>®</sup> 488 (Goat polyclonal, Abcam, ab150117)), nuclear mask ( $1\mu\text{g}/\text{mL}$ , HCS Nuclear Mask Blue Stain, Invitrogen, H10325) and  $1\mu\text{g}/\text{mL}$  Alexa Fluor<sup>®</sup> 633 conjugated wheat germ agglutinin (membrane stain, Alexa Fluor 633 conjugate, Invitrogen, W21404) were combined and incubated with the cells for 30 minutes on ice. Following rinsing with Dulbecco's phosphate buffered saline (D-PBS) (Corning, 21-031-CVR) cells were fixed with 4% paraformaldehyde for 30 minutes on ice then finally rinsed with D-PBS before imaging in a Yokogawa CQ1 High Content Analysis System. Cell surface expression was determined by measuring the fluorescence intensity of Alex Fluor<sup>®</sup> 488 (MMAE) that was co-localized with Alexa Fluor<sup>®</sup> 633 (wheat germ agglutinin). Given the expected biological variation associated with a cell-based assay, some data points were excluded to allow appropriate curve fitting. Data were background subtracted using the formula  $(\text{Test well}_{[[\text{Cell}]]} - \text{control well}_{[[\text{Cell}]]}) / (\text{Membrane Mean Intensity CH2 (AVG)}_{[[\text{Cell}]]} - \text{control well}_{[[\text{Cell}]]} \text{ (Membrane Mean Intensity CH2 (AVG))})$  where test well has been treated with compound and the control well is the mean of the two untreated wells for each test condition). Data were exported to GraphPad Prism (version 5) to fit  $Y = B_{\text{max}} * X / (K_d + X)$  to determine  $B_{\text{max}}$  and

$K_{d(\text{apparent})}$ . Where an RFU of < 10 was observed across all concentrations tested, this was not considered significant and a  $K_d$  of >10000 (top concentration tested) was reported.

### **Binding of biotinylated Binder to plasma membrane and secreted proteins (Retrogenix assay)**

Off target binding was assessed at Retrogenix (now part of Charles River, High Peak, UK) using the biotinylated binder BCY9565 in a human plasma membrane protein cell array. For Primary screening, 5528 expression vectors, encoding both ZsGreen1 and a full-length human plasma membrane protein, or a cell-surface tethered human secreted protein, were arrayed in duplicate across 16 microarray slides ('slide-sets'). An expression vector (pIRES-hEGFR-IRES-ZsGreen1) was spotted in quadruplicate on every slide and was used to ensure that a minimal threshold of transfection efficiency had been achieved or exceeded on every slide. Human HEK293 cells were used for reverse transfection/expression. BCY9565 was added to each slide after cell fixation giving a final concentration of 1 $\mu$ M of each molecule. Binding to target-expressing cells and untransfected cells was assessed using an Alexa Fluor647<sup>®</sup> streptavidin detection reagent (which was added after cell fixation in both cases), followed by fluorescence imaging. Two replicate slides were screened for each of the 16 slide-sets. Fluorescent images were analyzed and quantitated (for transfection) using ImageQuant software. To confirm the hits and assess specificity, vectors encoding all hits identified in the primary screen, plus vectors encoding TGFBR2 and EGFR, were arrayed and expressed in HEK293 cells on new slides. The Confirmation/Specificity screen and analysis was carried out as for primary screening except that identical slides were treated, after cell fixation, with 1  $\mu$ M of the test molecule alone, 1  $\mu$ M test molecule in the presence of 200  $\mu$ M of a non-biotinylated version of the test molecule (BCY8234), 1  $\mu$ g/ml biotinylated anti-TGFBR2, or no test antibody/Alexa Fluor647<sup>®</sup> streptavidin only (n=2 slides per treatment). A list of the 5528 plasma membrane and secreted proteins expressed in the Retrogenix assay are included at the end of this section.

### **Patch clamp studies on cardiac ion channels with BCY8126**

Potency of the Nectin-4 Bicycle Binder BCY8126 was assessed in Chinese hamster ovary (CHO) cells stably expressing three different cardiac ion channels, hERG, hK<sub>v</sub>1.5 or Na<sub>v</sub>1.5. Studies were performed at Metrion Biosciences, (Cambridge, UK). All experiments were performed on the QPatch gigaseal automated patch clamp platform. Membrane currents were elicited with different voltage protocols:

All cells passing the QC parameters (based on minimum current amplitude, membrane and series resistance and rundown) were selected as 'passed QC' using the QPatch software, which calculated the mean peak current for the last three sweeps at the end of each concentration application period from the cursor positions. Data was exported to Excel and interrogated using a bioinformatics suite developed running in Pipeline Pilot (Biovia, USA). The template calculated percent inhibition for each test concentration application period as the reduction in mean cursor value (peak current or charge) relative to the cursor value measured at the end of the control (i.e., vehicle) period. The percent inhibition

values from each cell were used to construct concentration-response curves employing a four-parameter logistic fit with 0 and 100% inhibition levels fixed at very low and very high concentrations, respectively, and a free Hill slope factor. The  $IC_{50}$  (50% inhibitory concentration) and Hill coefficient were then determined, but only data from cells with Hill slopes within  $0.5 < nH < 2.0$  were included. The  $IC_{50}$  data reported represented the mean (and S.D.) of at least three separate cells ( $N \geq 3$ ).

hERG currents were elicited from a holding potential of -90 mV using the industry standard “+40/-40” voltage protocol applied at a stimulus frequency of 0.1 Hz. hKv1.5 currents were elicited from a holding potential of -80 mV using a 900 ms depolarising step to 0 mV. The voltage protocol was applied at a stimulus frequency of 0.2 Hz. The use-dependent inhibition of hNav1.5 was assessed with a pulse train of 10 test pulses elicited at 1 Hz. Each depolarising sweep to -20 mV (20 ms) was initiated from a holding potential of -100 mV. Each sweep of the pulse train occurred at a 60s interval. Four pulse train voltage commands were recorded for each liquid period.

BCY8126 was screened at four concentrations (using 0.5-log unit dilutions) from a top concentration of 3  $\mu$ M, against a minimum of three separate cells. Each four-point concentration-response curve was constructed using cumulative single sample additions of each concentration to the same cell. Additionally, a four-point concentration-response curve was provided for reference positive control compounds for each ion channel.

### **Plasma protein binding and stability studies in plasma and hepatocytes**

Plasma protein binding and stability was assessed in CD1 mouse, Sprague Dawley rat, cynomolgus monkey and human plasma. Stability was also assessed in human hepatocytes and liver microsomes. All studies were conducted at WuXi AppTec Co. Ltd. (Shanghai, China).

Plasma Protein Binding studies were conducted on BT8009 incubated with plasma (2 $\mu$ M compound) for 30min at 37°C and then either incubated for a further 2h or ultracentrifuged (470,000g) for 2h to separate unbound drug. The concentration of BT8009 was measured by LC-MS/MS analysis using a modified generic method.

Stability studies were conducted on BT8009 incubated with pooled plasma (2 $\mu$ M compound, for up to 24h), hepatocytes (1 $\mu$ M compound,  $0.5 \times 10^6$ /mL cells, for up to 90 minutes) and microsomes (1 $\mu$ M compound, 0.5 mg/ml protein for up to 60 minutes). The incubation was stopped at pre-specified timepoints to produce a time course, and concentration of BT8009 measured by LC-MS/MS analysis using a modified generic method.

### **Measurement of BT8009 and MMAE in plasma**

Mouse (CD-1), Rat (Sprague Dawley) and cynomolgus monkey plasma samples were analyzed for BT8009 and MMAE (free toxin) using qualified bioanalytical methods based on protein precipitation

followed by liquid chromatographic triple quadrupole mass spectrometric (LC-MS/MS) analysis. Prepared plasma samples were spiked with internal standard and analyzed after methanol extraction. Standards and controls were prepared in tumor or plasma matrices in an identical manner.

### **Xenograft models**

Cell derived xenograft (CDX) studies were conducted in 6- to 8-week-old female BALB/c nude, or CB17-SCID, mice inoculated with  $\sim 10^7$  cells in the right flank. Animals were randomized when the average tumor volume reached the predesignated start size. Group size ranged from n= 3 to 6. For patient-derived xenograft (PDX) models a tumor fragment ( $\sim 30 \text{ mm}^3$ ) was implanted in the right flank. Tumor volumes were measured using calipers, and the volume calculated as  $V (\text{mm}^3) = 0.5 (a \times b^2)$ , where a and b are the long and short diameters of the tumor, respectively. These xenograft studies were conducted at WuXi AppTec (Shanghai, China).

Further PDX xenograft studies were performed at Champions Oncology, Inc, (Hackensack, NJ, USA). Studies were conducted in 6- to 8-week-old female athymic Nude-*Foxn1<sup>nu</sup>* mice implanted with a tumor fragment ( $\sim 125 \text{ mm}^3$ ) in the left flank. Tumor volumes were measured using calipers and tumor volume calculated as  $V (\text{mm}^3) = 0.52 (a \times b^2)$ , where a and b are the long and short diameters of the tumor, respectively.

All studies included a vehicle-treated control. In all studies, vehicle used was 25mM histidine pH7 in 10% sucrose, and dosing was conducted by intravenous bolus, routinely at weekly intervals although in some studies, regimens of twice weekly or once every two weeks were also used.

All the procedures related to animal handling, care and treatment in the studies were performed according to the guidelines approved by the Institutional Animal Care and Use Committee (IACUC) of WuXi AppTec (Shanghai, China) or Champions Oncology (Hackensack, NJ, USA), following the guidance of the Association for Assessment and Accreditation of Laboratory Animal Care.

**The 5528 human plasma membrane and secreted proteins in the Retrogenix assay are listed below.**

|          |           |         |        |          |          |           |          |         |          |
|----------|-----------|---------|--------|----------|----------|-----------|----------|---------|----------|
| A1BG     | ADAM17    | ADORA3  | ANO10  | AQP4     | AZGP1    | BTLA      | CA14     | CCER2   | CD200    |
| AADAACL2 | ADAM18    | ADORA3  | ANO10  | AQP5     | AZGP1    | BTN1A1    | CA2      | CCK     | CD200R1  |
| AAK1     | ADAM18    | ADORA3  | ANO2   | AQP6     | B2M      | BTN1A1    | CA4      | CCK     | CD200R1  |
| AAMP     | ADAM2     | ADRA1B  | ANO4   | AQP7     | B2M      | BTN2A1    | CA6      | CCKAR   | CD200R1  |
| ABCA1    | ADAM20    | ADRA1D  | ANO4   | AQP7     | B4GALT1  | BTN2A1    | CA9      | CCKBR   | CD200R1  |
| ABCA12   | ADAM20    | ADRA2A  | ANO5   | AQP8     | B4GALT1  | BTN2A1    | CABP1    | CCKBR   | CD200R1L |
| ABCA12   | ADAM21    | ADRA2B  | ANO6   | AQP8     | B4GALT1  | BTN2A2    | CABP2    | CCL1    | CD207    |
| ABCA3    | ADAM22    | ADRA2C  | ANO9   | AQP9     | B4GAT1   | BTN2A2    | CABP7    | CCL1    | CD209    |
| ABCA4    | ADAM22    | ADRB1   | ANOS1  | ARC      | BACE1    | BTN2A2    | CACHD1   | CCL11   | CD209    |
| ABCA7    | ADAM23    | ADRB2   | ANPEP  | ARHGAP17 | BACE1    | BTN2A2    | CACNA1S  | CCL11   | CD209    |
| ABCA8    | ADAM28    | ADRB3   | ANTXR1 | ARHGEF1  | BACE1    | BTN3A1    | CACNA1S  | CCL13   | CD22     |
| ABCA8    | ADAM29    | ADTRP   | ANTXR1 | ARHGEF2  | BACE1    | BTN3A1    | CACNA2D1 | CCL13   | CD22     |
| ABCB1    | ADAM30    | AFM     | ANTXR1 | ARMH4    | BACE2    | BTN3A2    | CACNA2D2 | CCL14   | CD22     |
| ABCB4    | ADAM32    | AGER    | ANTXR2 | ARSF     | BACE2    | BTN3A2    | CACNA2D2 | CCL14   | CD226    |
| ABCB4    | ADAM7     | AGER    | ANTXR2 | ARSF     | BACE2    | BTN3A2    | CACNA2D2 | CCL15   | CD24     |
| ABCB4    | ADAM8     | AGER    | ANTXRL | ARSI     | BAGE     | BTN3A3    | CACNA2D3 | CCL16   | CD244    |
| ABCB5    | ADAM8     | AGER    | ANXA1  | ARSJ     | BAGE2    | BTN3A3    | CACNA2D4 | CCL17   | CD244    |
| ABCB6    | ADAM8     | AGER    | ANXA1  | ARSK     | BAGE3    | BTNL2     | CACNA2D4 | CCL18   | CD247    |
| ABCC1    | ADAM9     | AGR2    | ANXA13 | ART3     | BAGE4    | BTNL3     | CACNB1   | CCL19   | CD247    |
| ABCC10   | ADAM9     | AGR2    | ANXA13 | ART3     | BAGE5    | BTNL8     | CACNB1   | CCL2    | CD248    |
| ABCC12   | ADAMDEC1  | AGRP    | ANXA2  | ART4     | BAIAP2L2 | BTNL9     | CACNB3   | CCL20   | CD27     |
| ABCC2    | ADAMTS1   | AGT     | ANXA2  | ART5     | BAMBI    | BVES      | CACNB4   | CCL21   | CD274    |
| ABCC3    | ADAMTS10  | AGTR1   | ANXA2  | ARTN     | BASP1    | C10orf128 | CACNG1   | CCL22   | CD274    |
| ABCC3    | ADAMTS13  | AGTR1   | ANXA3  | ASAH2    | BCAM     | C10orf54  | CACNG2   | CCL22   | CD276    |
| ABCC4    | ADAMTS16  | AGTR2   | ANXA5  | ASAH2    | BCAN     | C11orf24  | CACNG2   | CCL23   | CD276    |
| ABCC4    | ADAMTS17  | AGTRAP  | ANXA6  | ASGR1    | BCAN     | C11orf87  | CACNG3   | CCL24   | CD28     |
| ABCC5    | ADAMTS3   | AGTRAP  | ANXA7  | ASGR1    | BCAN     | C16orf89  | CACNG4   | CCL25   | CD300A   |
| ABCC6    | ADAMTS4   | AGTRAP  | ANXA9  | ASGR2    | BCHC     | C16orf89  | CACNG5   | CCL26   | CD300C   |
| ABCC8    | ADAMTS55  | AGTRAP  | AOC1   | ASGR2    | BDKRB1   | C17orf77  | CACNG5   | CCL27   | CD300E   |
| ABCC9    | ADAMTSL2  | AHCY    | AOC2   | ASIC1    | BDKRB1   | C17orf80  | CACNG6   | CCL28   | CD300LB  |
| ABCE1    | ADAMTSL2  | AHSG    | AOC3   | ASIC1    | BDKRB2   | C17orf80  | CACNG7   | CCL3    | CD300LB  |
| ABCG1    | ADAMTSL5  | AIFIL   | AOC3   | ASIC2    | BDNF     | C19orf18  | CADM1    | CCL3L1  | CD300LD  |
| ABCG1    | ADCY3     | AIFIL   | AP2A2  | ASIC2    | BDNF     | C1orf101  | CADM1    | CCL4    | CD300LF  |
| ABCG2    | ADCY4     | AIF1L   | APBB1  | ASIC3    | BEST1    | C1orf210  | CADM2    | CCL5    | CD300LF  |
| ABCG2    | ADCY5     | AJAP1   | APCDD1 | ASIC3    | BEST1    | C1orf54   | CADM3    | CCL7    | CD300LG  |
| ABCG8    | ADCY6     | AKR1A1  | APCS   | ASIC4    | BEST1    | C1QA      | CADM3    | CCL8    | CD302    |
| ABHD12   | ADCY9     | AKR1B10 | APELA  | ASIC5    | BEST2    | C1QA      | CADM4    | CCNYL1  | CD302    |
| ABHD15   | ADCYAP1   | ALCAM   | APH1B  | ASIC5    | BEST3    | C1QB      | CALCA    | CCR1    | CD320    |
| ABHD15   | ADCYAP1R1 | ALCAM   | APLN   | ASIP     | BEST3    | C1QB      | CALCB    | CCR1    | CD320    |
| ABHD17A  | ADCYAP1R1 | ALCAM   | APLN   | ASPN     | BEST4    | C1QBP     | CALCR    | CCR10   | CD33     |
| ABHD17B  | ADCYAP1R1 | ALCAM   | APLNR  | ASPRV1   | BGLAP    | C1QBP     | CALCR    | CCR10   | CD33     |
| ABHD2    | ADD2      | ALG10   | APLP1  | ASTN1    | BGN      | C1QC      | CALCRL   | CCR2    | CD34     |
| ABHD6    | ADGRA1    | ALG10B  | APLP1  | ATP10D   | BLK      | C1QL1     | CALHM1   | CCR2    | CD36     |
| ABI3BP   | ADGRA2    | ALK     | APLP2  | ATP10D   | BMP1     | C1QL1     | CALN1    | CCR2    | CD37     |
| ABI3BP   | ADGRA3    | ALKAL1  | APLP2  | ATP10D   | BMP10    | C1QL2     | CALR     | CCR3    | CD38     |
| ABO      | ADGRB1    | ALKAL2  | APLP2  | ATP11A   | BMP10    | C1QL4     | CALR     | CCR4    | CD3D     |
| ABRA     | ADGRB3    | ALOX12  | APMAP  | ATP11B   | BMP15    | C1QTNF1   | CALU     | CCR5    | CD3E     |
| ACE      | ADGRD1    | ALPI    | APMAP  | ATP11C   | BMP2     | C1QTNF12  | CALY     | CCR6    | CD3G     |
| ACE      | ADGRD1    | ALPL    | APMAP  | ATP13A1  | BMP3     | C1QTNF2   | CAMK1G   | CCR6    | CD4      |
| ACE      | ADGRE1    | ALPL    | APOA1  | ATP13A1  | BMP4     | C1QTNF3   | CAMK2A   | CCR7    | CD4      |
| ACE2     | ADGRE1    | ALPP    | APOA1  | ATP13A2  | BMP5     | C1QTNF4   | CAMK2D   | CCR7    | CD40     |
| ACHE     | ADGRE2    | ALPPL2  | APOA2  | ATP13A4  | BMP8A    | C1QTNF5   | CAMK2G   | CCR8    | CD40     |
| ACHE     | ADGRE3    | AMBN    | APOA2  | ATP1A1   | BMP8B    | C1QTNF6   | CAMK2N1  | CCR9    | CD40     |
| ACHE     | ADGRE3    | AMBP    | APOA4  | ATP1A2   | BMP8B    | C1QTNF7   | CAMLG    | CCR9    | CD40     |
| ACKR1    | ADGRF1    | AMBP    | APOA5  | ATP1A3   | BMPER    | C1QTNF8   | CAMP     | CCR9    | CD40LG   |
| ACKR1    | ADGRF1    | AMELX   | APOA5  | ATP1A4   | BMPR1A   | C1QTNF9   | CANT1    | CCR9    | CD40LG   |
| ACKR1    | ADGRF1    | AMELY   | APOC1  | ATP1A4   | BMPR1B   | C1QTNF9B  | CANT1    | CCR12   | CD44     |
| ACKR2    | ADGRF2    | AMH     | APOC1  | ATP1B1   | BMPR2    | C1RL      | CANT1    | CCR12   | CD44     |
| ACKR3    | ADGRF3    | AMHR2   | APOC1  | ATP1B2   | BOC      | C2        | CAPG     | CCR12   | CD44     |
| ACKR3    | ADGRF4    | AMIGO1  | APOC2  | ATP1B3   | BOC      | C21orf63  | CAPN1    | CCSMST1 | CD44     |
| ACKR4    | ADGRF5    | AMIGO2  | APOC3  | ATP2B2   | BPI      | C3        | CAPN10   | CD101   | CD46     |
| ACP4     | ADGRG1    | AMIGO3  | APOC3  | ATP2B3   | BPI      | C3AR1     | CARTPT   | CD109   | CD46     |
| ACP7     | ADGRG1    | AMN     | APOC4  | ATP2B4   | BPIFA1   | C3AR1     | CASR     | CD14    | CD46     |
| ACPP     | ADGRG1    | AMTN    | APOD   | ATP2C2   | BPIFA2   | C4BPB     | CATSPER1 | CD151   | CD47     |
| ACPP     | ADGRG1    | AMTN    | APOD   | ATP4A    | BPIFA3   | C5AR1     | CATSPER2 | CD160   | CD47     |
| ACPP     | ADGRG1    | AMY2B   | APOE   | ATP4B    | BPIFB1   | C5AR1     | CATSPER2 | CD163   | CD47     |
| ACVR1    | ADGRG2    | ANG     | APOE   | ATP6AP2  | BPIFB2   | C5AR2     | CATSPER2 | CD163   | CD48     |
| ACVR1B   | ADGRG2    | ANGPT1  | APOF   | ATP6AP2  | BPIFB3   | C6        | CATSPER3 | CD163L1 | CD5      |
| ACVR1B   | ADGRG2    | ANGPT1  | APOH   | ATP6V0A2 | BPIFB4   | C6        | CATSPER4 | CD163L1 | CD52     |
| ACVR1C   | ADGRG3    | ANGPT1  | APOL1  | ATP6V0E1 | BPIFB6   | C6orf15   | CATSPERD | CD164   | CD53     |
| ACVR1C   | ADGRG5    | ANGPT2  | APOL1  | ATP7B    | BPIFC    | C6orf89   | CATSPERG | CD164   | CD55     |
| ACVR2A   | ADGRG7    | ANGPT2  | APOL4  | ATP9A    | BRICD5   | C7        | CBLN1    | CD164L2 | CD55     |
| ACVR2A   | ADGRL1    | ANGPT2  | APOM   | ATP9B    | BRICD5   | C8A       | CBLN1    | CD177   | CD58     |
| ACVR2B   | ADGRL4    | ANGPT4  | APOM   | ATRAID   | BRINP2   | C8A       | CBLN1    | CD177   | CD58     |
| ACVRL1   | ADGRL4    | ANGPT4  | APOM   | ATRAID   | BR33     | C8B       | CBLN2    | CD180   | CD59     |
| ADA      | ADIPOQ    | ANGPTL3 | APP    | ATRAID   | BSG      | C8B       | CBLN3    | CD19    | CD59     |
| ADAM10   | ADIPOQ    | ANGPTL4 | APP    | ATRNL1   | BSG      | C8G       | CBLN3    | CD19    | CD5L     |
| ADAM11   | ADIPOR1   | ANGPTL5 | APP    | ATRNL1   | BSND     | C8G       | CBLN4    | CD19    | CD6      |
| ADAM12   | ADIPOR2   | ANGPTL6 | AQP1   | ATRNL1   | BSPH1    | C9        | CBE1     | CD1A    | CD6      |
| ADAM12   | ADM       | ANGPTL7 | AQP1   | AVP      | BST1     | C9orf135  | CCDC126  | CD1B    | CD63     |
| ADAM12   | ADM2      | ANGPTL7 | AQP1   | AVPR1A   | BST2     | CA11      | CCDC134  | CD1C    | CD63     |
| ADAM12   | ADM5      | ANGPTL8 | AQP1   | AVPR1B   | BTC      | CA11      | CCDC134  | CD1D    | CD68     |
| ADAM15   | ADORA1    | ANKH    | AQP10  | AVPR2    | BDT      | CA12      | CCDC70   | CD1E    | CD69     |
| ADAM15   | ADORA2A   | ANKS1B  | AQP2   | AVPR2    | BTLA     | CA12      | CCDC70   | CD2     | CD7      |
| ADAM15   | ADORA2B   | ANO1    | AQP3   | AXL      | BTLA     | CA12      | CCDC80   | CD200   | CD7      |

|          |         |          |          |         |          |          |          |          |          |
|----------|---------|----------|----------|---------|----------|----------|----------|----------|----------|
| CD70     | CD84    | CD8B     | CD99L2   | CDH13   | CDH26    | CDHR1    | CEACAM1  | CEACAM5  | CFB      |
| CD72     | CD84    | CD8B     | CD99L2   | CDH15   | CDH3     | CDHR1    | CEACAM1  | CEACAM6  | CFB      |
| CD74     | CD86    | CD9      | CD99L2   | CDH15   | CDH4     | CDHR1    | CEACAM1  | CEACAM7  | CFB      |
| CD74     | CD86    | CD93     | CD99L2   | CDH16   | CDH5     | CDHR2    | CEACAM1  | CEACAM8  | CFB      |
| CD74     | CD8A    | CD96     | CDCP1    | CDH17   | CDH5     | CDHR3    | CEACAM19 | CELA1    |          |
| CD79A    | CD8A    | CD96     | CDCP1    | CDH18   | CDH6     | CDHR4    | CEACAM19 | CELA2A   |          |
| CD79B    | CD8A    | CD96     | CDCP1    | CDH19   | CDH6     | CDIPT    | CEACAM20 | CELA2B   |          |
| CD80     | CD8B    | CD97     | CDCP2    | CDH2    | CDH7     | CDNF     | CEACAM21 | CEND1    |          |
| CD81     | CD8B    | CD97     | CDH1     | CDH20   | CDH7     | CDON     | CEACAM21 | CER1     |          |
| CD82     | CD8B    | CD97     | CDH11    | CDH22   | CDH8     | CDSN     | CEACAM3  | CES5A    |          |
| CD83     | CD8B    | CD99     | CDH12    | CDH23   | CDH9     | CDSN     | CEACAM4  | CETP     |          |
| CFC1     | CLDN1   | CLMP     | COL6A2   | CSN1S1  | CYB5D2   | DHH      | EDA      | ENTPD5   | F2R      |
| CFC1B    | CLDN10  | CLPS     | COL6A2   | CSN2    | CYBA     | DHH      | EDA      | ENTPD6   | F2R      |
| CFD      | CLDN11  | CLPS     | COL8A1   | CSN3    | CYBB     | DHH      | EDA      | ENTPD8   | F2RL1    |
| CFH      | CLDN12  | CLPSL1   | COL9A2   | CSNK2B  | CYBRD1   | DHRS11   | EDA      | ENTPD8   | F2RL1    |
| CFHR3    | CLDN14  | CLPSL2   | COLEC10  | CSPG4   | CYR61    | DHRS13   | EDA2R    | EPB41L2  | F2RL2    |
| CFHR4    | CLDN14  | CLPTM1   | COLEC11  | CSPG5   | CYSLTR1  | DHRS4L2  | EDAR     | EPB41L3  | F2RL3    |
| CFHR5    | CLDN15  | CLPTM1   | COLEC12  | CSPG5   | CYSLTR1  | DHRS7B   | EDDM3A   | EPB41L3  | F3       |
| CFI      | CLDN15  | CLPTM1L  | COLQ     | CSPG5   | CYSLTR2  | DHRS7C   | EDDM3B   | EPB41L5  | F3       |
| CGA      | CLDN15  | CLRN2    | COMP     | CST1    | CYTH1    | DHRSX    | EDIL3    | EPCAM    | F5       |
| CGB2     | CLDN16  | CLSTN1   | COMT     | CST11   | CYTL1    | DIO3     | EDN1     | EPDR1    | F5       |
| CGB7     | CLDN17  | CLSTN2   | COMT     | CST2    | CYTL1    | DIO3     | EDN2     | EPDR1    | F5       |
| CHAD     | CLDN18  | CLSTN3   | CORIN    | CST3    | CYYR1    | DIRAS1   | EDN3     | EPDR1    | F5       |
| CHGA     | CLDN18  | CMA1     | CORT     | CST3    | DAG1     | DIRAS2   | EDNRA    | EPGN     | F7       |
| CHGB     | CLDN19  | CMKLR1   | CPA1     | CST4    | DAGLA    | DIRAS3   | EDNRB    | EPGN     | F7       |
| CHI3L2   | CLDN19  | CMKLR1   | CPA2     | CST5    | DAGLE    | DISP1    | EFEMP2   | EPHA1    | F8       |
| CHIA     | CLDN2   | CMTM2    | CPA4     | CST6    | DAND5    | DKK1     | EFNA1    | EPHA10   | F8       |
| CHIC2    | CLDN20  | CMTM3    | CPA6     | CST7    | DAPP1    | DKK1     | EFNA2    | EPHA10   | F9       |
| CHID1    | CLDN22  | CMTM4    | CPB2     | CST8    | DCBLD1   | DKK2     | EFNA3    | EPHA10   | F9       |
| CHIT1    | CLDN23  | CMTM5    | CPD      | CST9    | DCBLD2   | DKK3     | EFNA4    | EPHA2    | FADS2    |
| CHODL    | CLDN24  | CMTM5    | CPE      | CST9L   | DCC      | DKK4     | EFNA5    | EPHA3    | FAIM2    |
| CHODL    | CLDN25  | CMTM6    | CPE      | CSTL1   | DCD      | DKKL1    | EFNB1    | EPHA3    | FAM127A  |
| CHRD1    | CLDN3   | CMTM7    | CPLX3    | CTF1    | DCLK1    | DLG2     | EFNB2    | EPHA3    | FAM168B  |
| CHRFAM7A | CLDN34  | CNDP1    | CPM      | CTGF    | DCSTAMP  | DLG3     | EFNB3    | EPHA4    | FAM168B  |
| CHRFAM7A | CLDN4   | CNGA1    | CPN1     | CTGF    | DDR1     | DLG4     | EFR3A    | EPHA4    | FAM171A1 |
| CHRM1    | CLDN5   | CNGA2    | CPN2     | CTHRC1  | DDR1     | DLK1     | EGF      | EPHA5    | FAM171A2 |
| CHRM1    | CLDN6   | CNGA3    | CPQ      | CTLA4   | DDR2     | DLK2     | EGFL7    | EPHA6    | FAM171B  |
| CHRM1    | CLDN7   | CNGA3    | CPXM1    | CTLA4   | DEAF1    | DLK2     | EGFL8    | EPHA7    | FAM171B  |
| CHRM2    | CLDN8   | CNGA3    | CPZ      | CTNNA1  | DEFA1B   | DLL1     | EGFLAM   | EPHA7    | FAM172A  |
| CHRM3    | CLDN9   | CNGA4    | CR2      | CTNS    | DEFA3    | DLL3     | EGFR     | EPHA8    | FAM174A  |
| CHRM3    | CLDND1  | CNGB1    | CR2      | CTRB1   | DEFA3    | DLL4     | EGFR     | EPHA8    | FAM174B  |
| CHRM4    | CLEC10A | CNGB3    | CRB1     | CTRB2   | DEFA4    | DMD      | EGFR     | EPHB1    | FAM180A  |
| CHRM5    | CLEC10A | CNMD     | CRB2     | CTSB    | DEFA5    | DMKN     | EGFR     | EPHB2    | FAM187B  |
| CHRNA1   | CLEC11A | CNNM1    | CRB3     | CTSB    | DEFA5    | DMP1     | EGFR     | EPHB3    | FAM198A  |
| CHRNA1   | CLEC12A | CNNM2    | CREG1    | CUTA    | DEFA6    | DNAJB4   | ELFN1    | EPHB4    | FAM198B  |
| CHRNA10  | CLEC12B | CNNM4    | CREG2    | CUZD1   | DEFB1    | DNAJC16  | ELSPBP1  | EPHB6    | FAM198B  |
| CHRNA2   | CLEC12B | CNP      | CRELD1   | CX3CL1  | DEFB106B | DNASE1   | EMB      | EPHX4    | FAM198B  |
| CHRNA3   | CLEC14A | CNPY4    | CRELD2   | CX3CL1  | DEFB107B | DNASE1L2 | EMC1     | EPO      | FAM19A1  |
| CHRNA3   | CLEC14A | CNPY4    | CRH      | CX3CL1  | DEFB108B | DNASE1L3 | EMC10    | EPOR     | FAM19A3  |
| CHRNA3   | CLEC15B | CNR1     | CRHBP    | CX3CR1  | DEFB108B | DNER     | EMC10    | EPPIN    | FAM19A4  |
| CHRNA4   | CLEC17A | CNR1     | CRHBP    | CX3CR1  | DEFB110  | DPCR1    | EMC7     | EPYC     | FAM19A5  |
| CHRNA4   | CLEC18B | CNR2     | CRHR1    | CXADR   | DEFB110  | DPEP1    | EMCN     | ERAS     | FAM200A  |
| CHRNA4   | CLEC18C | CNST     | CRHR1    | CXADR   | DEFB112  | DPEP2    | EMCN     | ERBB2    | FAM209A  |
| CHRNA5   | CLEC1A  | CNST     | CRHR2    | CXCL1   | DEFB112  | DPP10    | EMID1    | ERBB3    | FAM209B  |
| CHRNA6   | CLEC1B  | CNTFR    | CRIM1    | CXCL1   | DEFB113  | DPP4     | EMLIN1   | ERBB3    | FAM20A   |
| CHRNA7   | CLEC1B  | CNTN1    | CRIM1    | CXCL10  | DEFB113  | DPP6     | EMP1     | ERBB3    | FAM20C   |
| CHRNA7   | CLEC2A  | CNTN2    | CRISP2   | CXCL10  | DEFB114  | DPP7     | EMP2     | ERBB3    | FAM213A  |
| CHRNA9   | CLEC2B  | CNTN4    | CRISPLD1 | CXCL11  | DEFB115  | DPT      | EMP2     | ERBB4    | FAM234A  |
| CHRNB1   | CLEC2D  | CNTN4    | CRISPLD2 | CXCL12  | DEFB115  | DRAXIN   | ENAM     | ERBB4    | FAM24A   |
| CHRNB2   | CLEC2D  | CNTN6    | CRLF2    | CXCL13  | DEFB116  | DRD1     | ENDOD1   | EREG     | FAM24B   |
| CHRNB3   | CLEC2D  | CNTNAP1  | CRLF2    | CXCL14  | DEFB116  | DRD2     | ENDOU    | ERFE     | FAM26F   |
| CHRNB4   | CLEC2D  | CNTNAP2  | CRLF3    | CXCL16  | DEFB118  | DRD3     | ENG      | ERMAP    | FAM3A    |
| CHRNA6   | CLEC3A  | CNTNAP3  | CRP      | CXCL16  | DEFB119  | DRD4     | ENHO     | ERVFRD-1 | FAM3B    |
| CHRNA6   | CLEC3B  | CNTNAP3B | CRTAC1   | CXCL16  | DEFB121  | DRD5     | ENO1     | ERVH48-1 | FAM3D    |
| CHRNA6   | CLEC4A  | CNTNAP5  | CRTAC1   | CXCL17  | DEFB123  | DSC1     | ENO2     | ERVW-1   | FAM3D    |
| CHRNA6   | CLEC4C  | COCH     | CRTAM    | CXCL2   | DEFB124  | DSC2     | ENOX1    | ESAM     | FAM57A   |
| CHST9    | CLEC4D  | COL10A1  | CRTAP    | CXCL3   | DEFB124  | DSG1     | ENOX1    | ESM1     | FAM65B   |
| CHSY1    | CLEC4E  | COL13A1  | CRTAP    | CXCL3   | DEFB125  | DSG2     | ENOX2    | ESR1     | FAP      |
| CKAP4    | CLEC4F  | COL15A1  | CSF1     | CXCL5   | DEFB126  | DSG3     | ENOX2    | EVA1C    | FAS      |
| CKLF     | CLEC4F  | COL17A1  | CSF1     | CXCL6   | DEFB127  | DSG3     | ENPP1    | EVC      | FAS      |
| CKLF     | CLEC4G  | COL19A1  | CSF1R    | CXCL8   | DEFB128  | DUOX1    | ENPP1    | EVI2A    | FAS      |
| CLC      | CLEC4G  | COL1A1   | CSF2     | CXCL9   | DEFB129  | DUOX2    | ENPP1    | EVI2A    | FAS      |
| CLC      | CLEC4M  | COL1A1   | CSF2RA   | CXCR1   | DEFB130A | DUOXA1   | ENPP2    | EVI2A    | FAS      |
| CLCA1    | CLEC4M  | COL1A2   | CSF2RA   | CXCR1   | DEFB131A | DUOXA1   | ENPP3    | EVI2B    | FAS      |
| CLCA1    | CLEC5A  | COL1A2   | CSF2RA   | CXCR2   | DEFB131B | DUOXA2   |          | EXTL2    | FAS      |
| CLCA2    | CLEC6A  | COL20A1  | CSF2RA   | CXCR2   | DEFB132  | DUSP15   | ENPP3    | EXTL2    | FASLG    |
| CLCA2    | CLEC6A  | COL23A1  | CSF2RB   | CXCR3   | DEFB133  | DUSP15   | ENPP4    | F10      | FASLG    |
| CLCA4    | CLEC7A  | COL23A1  | CSF2RB   | CXCR3   | DEFB134  | DYNAP    | ENPP5    | F10      | FBLN5    |
| CLCF1    | CLEC7A  | COL25A1  | CSF3     | CXCR4   | DEFB135  | EBAG9    | ENPP5    | F11      | FBLN7    |
| CLCF1    | CLEC7A  | COL25A1  | CSF3R    | CXCR4   | DEFB135  | EBI3     | ENPP6    | F11      | FCAMR    |
| CLCN2    | CLEC7A  | COL25A1  | CSF3R    | CXCR5   | DEFB135  | EBI3     | ENPP7    | F11R     | FCAR     |
| CLCN2    | CLEC9A  | COL25A1  | CSF3R    | CXCR5   | DEFB136  | ECE1     | ENTPD1   | F12      | FCAR     |
| CLCN3    | CLECL1  | COL26A1  | CSF3R    | CXCR6   | DEFB136  | ECM1     | ENTPD1   | F13A1    | FCAR     |
| CLCN4    | CLIC1   | COL6A1   | CSH1     | CXCR6   | DES      | ECM2     | ENTPD2   | F13B     | FCAR     |
| CLCNKB   | CLIC4   | COL6A2   | CSHL1    | CXorf61 | DGCR2    | ECSCR    | ENTPD3   | F2       | FCAR     |
| CLCNKB   | CLMP    | COL6A2   | CSMD2    | CXorf66 | DGKB     | EDA      | ENTPD3   | F2       | FCAR     |

|        |        |        |          |         |        |           |          |         |          |
|--------|--------|--------|----------|---------|--------|-----------|----------|---------|----------|
| FCAR   | FGFRL1 | GABRB2 | GIF      | GPC5    | GPR6   | GZMA      | HRH2     | IFNG    | IL17RA   |
| FCAR   | FGG    | GABRB3 | GINM1    | GPC5    | GPR61  | GZMK      | HRH2     | IFNGR1  | IL17RB   |
| FCAR   | FGG    | GABRB3 | GIP      | GPC6    | GPR62  | GZMM      | HRH3     | IFNGR2  | IL17RC   |
| FCER1A | FGL1   | GABRD  | GIPR     | GPC6    | GPR63  | HAMP      | HRH4     | IFNGR2  | IL17RC   |
| FCER1G | FIBCD1 | GABRE  | GJA1     | GPER1   | GPR65  | HAPLN1    | HS6S71   | IFNK    | IL17RD   |
| FCER1G | FIBIN  | GABRE  | GJA10    | GPER1   | GPR65  | HAPLN2    | HSD11B1L | IFNK    | IL17RD   |
| FCER2  | FITM1  | GABRG1 | GJA3     | GPHA2   | GPR68  | HAPLN3    | HSD17B11 | IFNL1   | IL17RE   |
| FCER2  | FITM2  | GABRG2 | GJA3     | GPHB5   | GPR68  | HAPLN3    | HSD17B13 | IFNL2   | IL17RE   |
| FCGR1A | FJX1   | GABRG3 | GJA4     | GPIHBP1 | GPR75  | HAPLN4    | HSD17B7  | IFNL3   | IL18     |
| FCGR1B | FLNB   | GABRP  | GJA5     | GPLD1   | GPR78  | HAS1      | HSPB6    | IFNL4   | IL18     |
| FCGR1B | FLOT1  | GABRQ  | GJA8     | GPLD1   | GPR82  | HAS2      | HTN1     | IFNLR1  | IL18BP   |
| FCGR2A | FLRT1  | GABRR1 | GJA9     | GPLD1   | GPR83  | HAS2      | HTN3     | IFNLR1  | IL18R1   |
| FCGR2A | FLRT1  | GABRR1 | GJB1     | GPM6A   | GPR84  | HAS3      | HTR1A    | IFNW1   | IL18RAP  |
| FCGR2B | FLRT1  | GABRR1 | GJB2     | GPM6B   | GPR84  | HAS3      | HTR1B    | IGDCC3  | IL19     |
| FCGR2B | FLRT1  | GABRR2 | GJB3     | GPM6B   | GPR85  | HAS3      | HTR1D    | IGDCC4  | IL1A     |
| FCGR2C | FLRT2  | GABRR2 | GJB4     | GPNMB   | GPR85  | HAVCR1    | HTR1D    | IGF1    | IL1A     |
| FCGR3A | FLRT2  | GABRR3 | GJB5     | GPNMB   | GPR87  | HAVCR2    | HTR1E    | IGF1R   | IL1B     |
| FCGR3A | FLRT3  | GAD2   | GJB6     | GPNMB   | GPR88  | HBEGF     | HTR1F    | IGF2    | IL1B     |
| FCGR3A | FLRT3  | GAL    | GJB7     | GPR1    | GPR89B | HCAAR1    | HTR2A    | IGFALS  | IL1F10   |
| FCGR3B | FLRT3  | GALNT1 | GJC1     | GPR101  | GPRC5A | HCAAR1    | HTR2A    | IGFBP1  | IL1R1    |
| FCGR3B | FLT1   | GALNT2 | GJC2     | GPR108  | GPRC5B | HCAAR2    | HTR2B    | IGFBP2  | IL1R1    |
| FCGRT  | FLT1   | GALNT2 | GJC3     | GPR119  | GPRC5C | HCAAR3    | HTR2C    | IGFBP3  | IL1R2    |
| FCMR   | FLT3   | GALP   | GJD2     | GPR12   | GPRC5C | HCG22     | HTR3A    | IGFBP4  | IL1R2    |
| FCMR   | FLT3LG | GALP   | GJD3     | GPR132  | GPRC5C | HCK       | HTR3A    | IGFBP5  | IL1R2    |
| FCMR   | FLT4   | GALR1  | GJD4     | GPR132  | GPRC5C | HCN1      | HTR3B    | IGFBP6  | IL1RAP   |
| FCN1   | FLVCR1 | GALR2  | GKN1     | GPR135  | GPRC5D | HCN1      | HTR3C    | IGFBP7  | IL1RAP   |
| FCN1   | FLVCR2 | GALR3  | GKN2     | GPR137  | GPRC6A | HCN3      | HTR3C    | IGFBP11 | IL1RAP   |
| FCN2   | FMO5   | GAST   | GKN2     | GPR137B | GPX3   | HCN4      | HTR3D    | IGFL1   | IL1RAPL2 |
| FCN3   | FMR1NB | GATD1  | GLB1L    | GPR137C | GPX5   | HCN4      | HTR3D    | IGFL2   | IL1RL1   |
| FCRL1  | FNDC10 | GBP1   | GLB1L2   | GPR137C | GPX7   | HCRTR1    | HTR3E    | IGFL3   | IL1RL1   |
| FCRL2  | FNDC4  | GBP1   | GLDN     | GPR139  | GREM1  | HCRTR2    | HTR3E    | IGFL4   | IL1RL1   |
| FCRL2  | FNDC4  | GBP1   | GLG1     | GPR141  | GREM2  | HCST      | HTR4     | IGFLR1  | IL1RL2   |
| FCRL2  | FNDC5  | GC     | GLG1     | GPR142  | GRIA1  | HEPACAM   | HTR5A    | IGHA1   | IL1RL2   |
| FCRL3  | FNDC5  | GC     | GLIPR1L2 | GPR143  | GRIA2  | HEPH      | HTR6     | IGHD    | IL1RN    |
| FCRL3  | FNDC5  | GCG    | GLIPR1L2 | GPR143  | GRIA3  | HEPHL1    | HTR7     | IGHG3   | IL1RN    |
| FCRL4  | FOLH1  | GCG    | GLP1R    | GPR146  | GRIA3  | HFE       | HTR7     | IGHM    | IL1RN    |
| FCRL5  | FOLH1  | GCGR   | GLP2R    | GPR148  | GRIA4  | HFE       | HTRA1    | IGIP    | IL2      |
| FCRL6  | FOLH1  | GCNT7  | GLRA1    | GPR149  | GRID1  | HFE       | HTRA4    | IGLL1   | IL20     |
| FCRLA  | FOLR1  | GDF1   | GLRA1    | GPR15   | GRID1  | HFE2      | HVCN1    | IGLL1   | IL20RA   |
| FDCSP  | FOLR1  | GDF10  | GLRA2    | GPR150  | GRIK1  | HFE2      | HYAL1    | IGLL5   | IL20RA   |
| FETUB  | FOLR2  | GDF11  | GLRA2    | GPR151  | GRIK1  | HFE2      | HYAL2    | IGLL5   | IL20RB   |
| FFAR1  | FOLR2  | GDF15  | GLRA3    | GPR151  | GRIK1  | HGFAC     | HYAL3    | IGLON5  | IL21     |
| FFAR2  | FOLR3  | GDF2   | GLRA4    | GPR152  | GRIK2  | HHIP      | HYAL4    | IGSF1   | IL21R    |
| FFAR3  | FPR1   | GDF2   | GLRB     | GPR153  | GRIK2  | HHLA1     | IAPP     | IGSF1   | IL22     |
| FFAR4  | FPR2   | GDF3   | GML      | GPR156  | GRIK3  | HHLA2     | IBSP     | IGSF1   | IL22RA1  |
| FGA    | FPR2   | GDF5   | GNA11    | GPR157  | GRIK4  | HIDE1     | ICAM1    | IGSF11  | IL22RA2  |
| FGB    | FPR3   | GDF6   | GNA13    | GPR158  | GRIK5  | HIGD1B    | ICAM2    | IGSF11  | IL23A    |
| FGB    | FRZB   | GDF9   | GNA15    | GPR160  | GRIN1  | HIGD1C    | ICAM2    | IGSF23  | IL23A    |
| FGF1   | FSHB   | GDNF   | GNAS     | GPR161  | GRIN1  | HILPDA    | ICAM3    | IGSF3   | IL23R    |
| FGF10  | FSHR   | GDPD1  | GNAS     | GPR162  | GRIN2A | HILPDA    | ICAM4    | IGSF5   | IL24     |
| FGF10  | FSTL1  | GDPD1  | GNAS     | GPR162  | GRIN2B | HLA-A     | ICAM4    | IGSF6   | IL25     |
| FGF16  | FSTL3  | GDPD2  | GNAS     | GPR17   | GRIN2C | HLA-B     | ICAM4    | IGSF8   | IL26     |
| FGF17  | FUCA2  | GDPD3  | GNB1     | GPR17   | GRIN2C | HLA-C     | ICAM5    | IGSF9   | IL26     |
| FGF18  | FURIN  | GDPD4  | GNB3     | GPR171  | GRIN2D | HLA-DOA   | ICOS     | IGSF9   | IL27     |
| FGF18  | FURIN  | GDPD5  | GNB4     | GPR173  | GRIN3A | HLA-DOB   | ICOS     | IHH     | IL27RA   |
| FGF19  | FXYD1  | GDPD5  | GNG11    | GPR173  | GRK7   | HLA-DPA1  | ICOSLG   | IHH     | IL2RA    |
| FGF20  | FXYD2  | GFOD1  | GNG12    | GPR176  | GRM1   | HLA-DPB1  | IDE      | IHH     | IL2RB    |
| FGF21  | FXYD3  | GFOD2  | GNG5     | GPR18   | GRM2   | HLA-DQA1  | IDE      | IL10    | IL2RG    |
| FGF22  | FXYD4  | GFRA1  | GNG7     | GPR182  | GRM3   | HLA-DQA2  | IER3     | IL10RA  | IL3      |
| FGF23  | FXYD5  | GFRA1  | GNG7     | GPR182  | GRM3   | HLA-DQB1  | IFI30    | IL10RB  | IL31     |
| FGF3   | FXYD6  | GFRA2  | GNGT1    | GPR183  | GRM4   | HLA-DQB2  | IFI30    | IL11    | IL31RA   |
| FGF4   | FXYD6  | GFRA3  | GPLY     | GPR183  | GRM5   | HLA-DRA   | IFITM1   | IL11RA  | IL31RA   |
| FGF5   | FXYD7  | GFRA4  | GNPTG    | GPR20   | GRM5   | HLA-DRB1  | IFITM10  | IL11RA  | IL31RA   |
| FGF6   | FZD1   | GFRA4  | GNRH1    | GPR21   | GRM6   | HLA-DRB3  | IFITM2   | IL11RA  | IL32     |
| FGF6   | FZD10  | GFRA4  | GNRH2    | GPR22   | GRM7   | HLA-DRB4  | IFITM3   | IL12A   | IL33     |
| FGF7   | FZD2   | GFRAL  | GNRHR    | GPR25   | GRM8   | HLA-DRB5  | IFITM5   | IL12B   | IL34     |
| FGF8   | FZD4   | GGH    | GP1BA    | GPR26   | GRN    | HLA-E     | IFNA10   | IL12B   | IL36A    |
| FGF9   | FZD5   | GGH    | GP1BB    | GPR27   | GRP    | HLA-F     | IFNA14   | IL12B   | IL36B    |
| FGFBP1 | FZD6   | GGT1   | GP2      | GPR3    | GRPR   | HLA-G     | IFNA16   | IL12RB1 | IL36G    |
| FGFBP1 | FZD7   | GGT1   | GP2      | GPR3    | GSG1L  | HMGB1     | IFNA16   | IL12RB1 | IL36RN   |
| FGFBP1 | FZD8   | GGT2   | GP5      | GPR31   | GSG1L  | HMGB2     | IFNA16   | IL12RB2 | IL37     |
| FGFBP2 | FZD9   | GGT5   | GP6      | GPR32   | GSG1L  | HMMR      | IFNA17   | IL13    | IL3RA    |
| FGFBP3 | G6B    | GGT5   | GP9      | GPR33   | GSG1L2 | HMMR      | IFNA2    | IL13RA1 | IL3RA    |
| FGFR1  | G6PD   | GGT5   | GPA33    | GPR34   | GUCA2A | HMSD      | IFNA21   | IL13RA2 | IL4      |
| FGFR1  | GABBR1 | GGT6   | GPBAR1   | GPR34   | GUCA2A | HNRNP2A2B | IFNA4    | IL15    | IL4R     |
| FGFR1  | GABBR1 | GGT7   | GPC1     | GPR35   | GUCA2B | 1         | IFNA5    | IL15    | IL4R     |
| FGFR1  | GABBR1 | GGTLC1 | GPC1     | GPR37   | GUCY2C | HOMER1    | IFNA6    | IL15RA  | IL5      |
| FGFR1  | GABBR1 | GGTLC2 | GPC2     | GPR37L1 | GUCY2C | HOMER2    | IFNA7    | IL15RA  | IL5RA    |
| FGFR2  | GABBR2 | GH1    | GPC2     | GPR39   | GUCY2D | HOMER3    | IFNA8    | IL15RA  | IL5RA    |
| FGFR2  | GABRA1 | GH2    | GPC2     | GPR4    | GUCY2F | HP        | IFNAR1   | IL16    | IL6      |
| FGFR2  | GABRA3 | GHRH   | GPC2     | GPR42   | GYPB   | HPN       | IFNAR2   | IL17A   | IL6      |
| FGFR3  | GABRA4 | GHRHR  | GPC2     | GPR45   | GYPB   | HPSE      | IFNAR2   | IL17B   | IL6R     |
| FGFR3  | GABRA5 | GHRL   | GPC3     | GPR50   | GYPB   | HPSE2     | IFNAR2   | IL17C   | IL6R     |
| FGFR3  | GABRA6 | GHSR   | GPC3     | GPR52   | GYPB   | HPX       | IFNB1    | IL17D   | IL6R     |
| FGFR4  | GABRE1 | GHSR   | GPC4     | GPR55   | GYPE   | HRG       | IFNE     | IL17D   | IL6ST    |
| FGFR4  | GABRE2 | GHSR   | GPC4     | GPR55   | GZMA   | HRH1      | IFNG     | IL17F   | IL6ST    |

|          |        |           |         |        |         |          |         |          |          |
|----------|--------|-----------|---------|--------|---------|----------|---------|----------|----------|
| IL6ST    | JTB    | KCNQ1     | KLRF2   | LHFPL5 | LRRC15  | LYZL6    | MFSD4B  | MSLN     | NECTIN2  |
| IL7      | KARS   | KCNQ2     | KLRG1   | LIF    | LRRC19  | M        | MFSD8   | MSLN     | NECTIN2  |
| IL7R     | KCNA1  | KCNQ2     | KLRK1   | LIFR   | LRRC25  | M6PR     | MFSD9   | MSLN     | NECTIN3  |
| IL9      | KCNA10 | KCNQ3     | KNG1    | LILRA1 | LRRC26  | MADCAM1  | MGAT4A  | MSLN     | NECTIN3  |
| IL9R     | KCNA2  | KCNQ4     | KNG1    | LILRA2 | LRRC32  | MADCAM1  | MGP     | MSLN     | NECTIN4  |
| IL9R     | KCNA2  | KCNQ4     | KRAS    | LILRA2 | LRRC37B | MAG      | MIA     | MSLN     | NECTIN4  |
| ILDR1    | KCNA3  | KCNQ5     | KREMEN1 | LILRA3 | LRRC4   | MAGEE1   | MICA    | MSMB     | NEGR1    |
| ILDR1    | KCNA4  | KCN51     | KREMEN2 | LILRA3 | LRRC4   | MAGT1    | MICB    | MSMP     | NEGR1    |
| IMP1     | KCNA5  | KCN52     | KREMEN2 | LILRA4 | LRRC4B  | MAL      | MICB    | MSN      | NELL2    |
| INHBB    | KCNA5  | KCN53     | KRT19   | LILRA5 | LRRC4C  | MAL      | MIF     | MSR1     | NELL2    |
| INHBC    | KCNA6  | KCNT1     | KRTDAP  | LILRA5 | LRRC52  | MAL      | MILR1   | MST1R    | NENF     |
| INPP5D   | KCNAB2 | KCNT1     | L1CAM   | LILRA6 | LRRC8A  | MAL2     | MIP     | MSTN     | NETO1    |
| INS      | KCNAB2 | KCNT1     | LACRT   | LILRB1 | LRRC8B  | MALL     | MLANA   | MTNR1A   | NETO1    |
| INSL3    | KCNB1  | KCNT2     | LAG3    | LILRB1 | LRRC8B  | MAMDC4   | MLN     | MTNR1A   | NETO2    |
| INSL4    | KCND1  | KCNV1     | LAG3    | LILRB2 | LRRC8C  | MANF     | MLNR    | MTNR1B   | NETO2    |
| INSL5    | KCND2  | KCNV2     | LAIR1   | LILRB3 | LRRC8D  | MANF     | MME     | MTRNR2L1 | NETO2    |
| INSL6    | KCNE1  | KCT2      | LAIR2   | LILRB4 | LRRC8E  | MAN5C1   | MMEL1   | MTRNR2L1 | NEU1     |
| INSR     | KCNE2  | KCTD12    | LAIR2   | LILRB5 | LRRN1   | MARCH6   | MMP10   | 0        | NEU1     |
| INSR     | KCNE3  | KDR       | LALBA   | LIM2   | LRRN2   | MARCKSL1 | MMP11   | MTRNR2L2 | NFAM1    |
| INSRR    | KCNE4  | KEL       | LALBA   | LIM2   | LRRN3   | MARCKSL1 | MMP12   | MTRNR2L3 | NFASC    |
| ISG15    | KCNE5  | KIAA0319  | LAMA4   | LIME1  | LRRN4   | MARCO    | MMP13   | MTRNR2L4 | NGEF     |
| ISLR     | KCNG1  | KIAA0319L | LAMA4   | LIMS2  | LRRN4CL | MARVELD1 | MMP14   | MTRNR2L5 | NGF      |
| ISLR2    | KCNG1  | KIAA0319L | LAMC1   | LINGO1 | LRRTM1  | MARVELD1 | MMP15   | MTRNR2L6 | NGFR     |
| ISM1     | KCNG3  | KIAA1161  | LAMC2   | LINGO1 | LRRTM2  | MARVELD2 | MMP15   | MTRNR2L7 | NGRN     |
| ISM2     | KCNG4  | KIAA1324  | LAMC3   | LINGO2 | LRRTM3  | MARVELD3 | MMP16   | MTRNR2L8 | NINJ1    |
| ITFG1    | KCNG4  | KIAA1324  | LAMP1   | LINGO3 | LRRTM3  | MARVELD3 | MMP17   | MTRNR2L9 | NINJ2    |
| ITGA10   | KCNH1  | KIAA1324L | LAMP2   | LINGO4 | LRRTM4  | MAS1     | MMP19   | MTUS1    | NINJ2    |
| ITGA11   | KCNH2  | KIAA2013  | LAMP5   | LIPC   | LRRTM4  | MAS1L    | MMP2    | MTUS1    | NIPA1    |
| ITGA2    | KCNH3  | KIR2DL1   | LAPTM4B | LIPC   | LRTM1   | MATN3    | MMP20   | MUC1     | NIPA1    |
| ITGA2B   | KCNH4  | KIR2DL1   | LAT     | LIPF   | LRTM2   | MBL2     | MMP21   | MUC1     | NIPA1    |
| ITGA3    | KCNH5  | KIR2DL2   | LAT     | LIPG   | LSAMP   | MC1R     | MMP24   | MUC1     | NIPA2    |
| ITGA4    | KCNH6  | KIR2DL3   | LAT     | LIPH   | LSAMP   | MC1R     | MMP25   | MUC1     | NIPAL1   |
| ITGA5    | KCNH6  | KIR2DL4   | LAT2    | LIPH   | LSP1    | MC2R     | MMP26   | MUC1     | NIPAL4   |
| ITGA6    | KCNH7  | KIR2DL5A  | LAX1    | LIP1   | LSR     | MC3R     | MMP28   | MUC1     | NKAIN1   |
| ITGA7    | KCNH8  | KIR2DL5B  | LAX1    | LIP1   | LST1    | MC3R     | MMP3    | MUC1     | NKAIN2   |
| ITGA7    | KCNIP1 | KIR2DS1   | LAYN    | LIPK   | LTA     | MC4R     | MMP7    | MUC1     | NKAIN2   |
| ITGA8    | KCNIP2 | KIR2DS2   | LAYN    | LIPM   | LTA     | MC4R     | MMP8    | MUC13    | NKAIN3   |
| ITGA9    | KCNIP3 | KIR2DS2   | LBP     | LIPN   | LTA     | MC5R     | MMP9    | MUC13    | NKAIN4   |
| ITGAD    | KCNJ1  | KIR2DS3   | LBP     | LLCFC1 | LTB     | MCAM     | MMRN1   | MUC15    | NKD2     |
| ITGAE    | KCNJ1  | KIR2DS4   | LCAT    | LMBR1  | LTB4R   | MCEMP1   | MMRN1   | MUC15    | NKG7     |
| ITGAL    | KCNJ10 | KIR2DS5   | LCAT    | LMBR1L | LTB4R2  | MCHR1    | MMRN2   | MUC20    | NLGN1    |
| ITGAL    | KCNJ11 | KIR3DL1   | LCK     | LMBR1L | LTBR    | MCHR1    | MOG     | MUC20    | NLGN2    |
| ITGAM    | KCNJ11 | KIR3DL2   | LCN1    | LMBRD1 | LTF     | MCHR2    | MOG     | MUC21    | NLGN3    |
| ITGAM    | KCNJ12 | KIR3DL3   | LCN12   | LMBRD1 | LTF     | MCOLN1   | MPEG1   | MUC4     | NLGN4X   |
| ITGAM    | KCNJ13 | KIR3DS1   | LCN15   | LMBRD2 | LTK     | MCOLN2   | MPIG6B  | MUC4     | NLGN4Y   |
| ITGAV    | KCNJ14 | KIR3DS1   | LCN2    | LNPEP  | LUZP2   | MCOLN3   | MPL     | MUC7     | NLRP3    |
| ITGAV    | KCNJ15 | KIRREL    | LCN6    | LNPEP  | LY6D    | MCOLN3   | MPZ     | MUCL1    | NMB      |
| ITGAV    | KCNJ16 | KIRREL2   | LCN8    | LOX    | LY6E    | MDGA1    | MPZ     | MUSK     | NMBR     |
| ITGB1    | KCNJ16 | KIRREL2   | LCN9    | LOXL2  | LY6G5B  | MDGA2    | MPZL1   | MXRA8    | NMBR     |
| ITGB1    | KCNJ18 | KIRREL3   | LCN9    | LOXL4  | LY6G5B  | MDK      | MPZL2   | MYADM    | NMS      |
| ITGB1    | KCNJ2  | KIRREL3   | LCN9    | LPAR1  | LY6G5C  | MDK      | MPZL3   | MYADM    | NMS      |
| ITGB1    | KCNJ3  | KISS1     | LCP1    | LPAR1  | LY6G5C  | MEGF10   | MR1     | MYDGF    | NMU      |
| ITGB2    | KCNJ4  | KISS1     | LCT     | LPAR2  | LY6G6C  | MEGF10   | MR1     | MYOF     | NMUR1    |
| ITGB3    | KCNJ5  | KISS1R    | LCTL    | LPAR3  | LY6G6D  | MEGF11   | MR1     | MZB1     | NMUR2    |
| ITGB3    | KCNJ6  | KIT       | LDLR    | LPAR4  | LY6G6F  | MEGF6    | MRAP    | NAALAD2  | NODAL    |
| ITGB5    | KCNJ6  | KIT       | LDLR    | LPAR5  | LY6H    | MEGF9    | MRAP    | NAALADL1 | NOG      |
| ITGB6    | KCNJ8  | KITLG     | LDLRAD2 | LPAR5  | LY6K    | MELTF    | MRAS    | NAALADL2 | NOMO1    |
| ITGB7    | KCNJ9  | KITLG     | LDLRAD3 | LPAR6  | LY86    | MEP1A    | MRC2    | NAALADL2 | NOMO3    |
| ITGB8    | KCNJ9  | KIT       | LEAP2   | LPAR6  | LY86    | MEP1B    | MRC2    | NAE1     | NOTCH1   |
| ITGBL1   | KCNK1  | KLK       | LECT1   | LPL    | LY9     | MEP1B    | MRGPRD  | NALCN    | NOTCH2   |
| ITGBL1   | KCNK10 | KLK10     | LECT2   | LPL    | LY9     | MEPE     | MRGPRD  | NAMPT    | NOTCH2NL |
| ITIH1    | KCNK12 | KLK11     | LEFTY1  | LRCH3  | LY9     | MERTK    | MRGPRE  | NAPSA    | NOTCH2NL |
| ITIH2    | KCNK13 | KLK12     | LEFTY2  | LRCH3  | LY96    | MERTK    | MRGPRE  | NAXD     | NOTCH3   |
| ITLN1    | KCNK16 | KLK13     | LEP     | LRFN1  | LY96    | MET      | MRGPRF  | NAXE     | NOTCH4   |
| ITLN1    | KCNK17 | KLK14     | LEPR    | LRFN2  | LYG1    | METRNL   | MRGPRG  | NBL1     | NOTUM    |
| ITLN2    | KCNK2  | KLK15     | LEPR    | LRFN3  | LYG2    | METRNL   | MRGPRX1 | NCAM1    | NOV      |
| ITM2A    | KCNK2  | KLK3      | LEPR    | LRFN4  | LYNX1   | METRNL   | MRGPRX2 | NCAN     | NOX1     |
| ITM2B    | KCNK4  | KLK3      | LGALS1  | LRFN5  | LYPD1   | METTL24  | MRGPRX2 | NCMAP    | NOX3     |
| ITM2B    | KCNK5  | KLK4      | LGALS1  | LRG1   | LYPD1   | MFAP2    | MRGPRX3 | NCMAP    | NOX4     |
| ITM2C    | KCNK6  | KLK5      | LGALS1  | LRIG1  | LYPD2   | MFAP3    | MRGPRX3 | NCR1     | NOX5     |
| ITPRIPL1 | KCNK7  | KLK6      | LGALS3  | LRIG1  | LYPD3   | MFAP3L   | MRGPRX3 | NCR1     | NPB      |
| ITPRIPL2 | KCNK7  | KLK6      | LGALS3  | LRIG2  | LYPD4   | MFAP3L   | MRGPRX4 | NCR2     | NPBWR1   |
| IYD      | KCNK7  | KLK7      | LGALS9  | LRP1   | LYPD4   | MFAP3L   | MS4A1   | NCR3     | NPBWR2   |
| IZUMO1   | KCNK9  | KLK7      | LGALS9  | LRP10  | LYPD5   | MFAP4    | MS4A10  | NCR3LG1  | NPC1L1   |
| IZUMO2   | KCNMA1 | KLK8      | LG12    | LRP11  | LYPD5   | MFAP5    | MS4A12  | NCSTN    | NPCC2    |
| IZUMO2   | KCNMB1 | KLK9      | LG13    | LRP12  | LYPD6   | MFGE8    | MS4A2   | NCSTN    | NPCC2    |
| IZUMO3   | KCNMB1 | KLKB1     | LG14    | LRP3   | LYPD6B  | MFGE8    | MS4A2   | NDFIP1   | NPFF     |
| IZUMO4   | KCNMB3 | KLKB1     | LGR4    | LRP4   | LYPD6B  | MFGE8    | MS4A3   | NDFIP1   | NPFF     |
| JAG1     | KCNMB3 | KLRB1     | LGR5    | LRP5   | LYPD6B  | MFGE8    | MS4A4A  | NDFIP2   | NPFFR1   |
| JAG2     | KCNMB4 | KLRC1     | LGR6    | LRP6   | LYPD8   | MF12     | MS4A5   | NDFIP2   | NPFFR2   |
| JAM2     | KCNN1  | KLRC1     | LHB     | LRP6   | LYSMD3  | MFRP     | MS4A6A  | NDNF     | NPHS1    |
| JAM3     | KCNN2  | KLRC2     | LHCGR   | LRP8   | LYSMD3  | MFSD10   | MS4A6E  | NDP      | NP1PB15  |
| JAM3     | KCNN2  | KLRC3     | LHFPL2  | LRP8   | LYSMD4  | MFSD14B  | MS4A6E  | NECTIN1  | NPPA     |
| JAML     | KCNN3  | KLRC4     | LHFPL3  | LRP8   | LYVE1   | MFSD14B  | MS4A7   | NECTIN1  | NPPB     |
| JAML     | KCNN3  | KLRD1     | LHFPL3  | LRP8   | LYZ     | MFSD2A   | MS4A8   | NECTIN1  | NPR1     |
| JCHAIN   | KCNN4  | KLRF1     | LHFPL4  | LRP8   | LYZL4   | MFSD2A   | MSLN    | NECTIN1  | NPR2     |

|       |         |        |          |         |          |         |          |         |         |
|-------|---------|--------|----------|---------|----------|---------|----------|---------|---------|
| NPR3  | NXP1    | OR5K1  | PANX3    | PCOLCE  | PLA1A    | PPBP    | PSG4     | RAET1L  | RS1     |
| NPR3  | NXP2    | OR5M9  | PAPLN    | PCOLCE2 | PLA2G10  | PPIA    | PSG5     | RAMP1   | RS1     |
| NPS   | NXP3    | OR5P2  | PAQR4    | PCSKIN  | PLA2G12A | PPIA    | PSG5     | RAMP2   | RSP01   |
| NPS   | NXP4    | OR5P3  | PAQR5    | PCSK2   | PLA2G12A | PPM1L   | PSG6     | RAMP3   | RSP02   |
| NPSR1 | NYX     | OR5P3  | PAQR5    | PCSK5   | PLA2G12B | PPM1L   | PSG7     | RARRS2  | RSP03   |
| NPSR1 | NYX     | OR5V1  | PAQR6    | PCSK7   | PLA2G1B  | PPP1R3F | PSG8     | RBPA    | RSP03   |
| NPTN  | OAS1    | OR6C2  | PAQR6    | PCSK7   | PLA2G2A  | PPT1    | PSG9     | RECK    | RSP04   |
| NPTN  | OBP2A   | OR6C3  | PAQR6    | PCSK9   | PLA2G2A  | PPT1    | PSORS1C2 | RECK    | RSPRY1  |
| NPTXR | OCA2    | OR7C2  | PAQR7    | PCYOX1  | PLA2G2C  | PPY     | PSPN     | REEP2   | RTBDN   |
| NPVF  | OCA2    | OR7D2  | PAQR8    | PCYOX1L | PLA2G2D  | PRADC1  | PSPN     | REEP2   | RTN4R   |
| NPW   | OCLN    | OR7E24 | PAQR8    | PDCD1   | PLA2G2D  | PRAP1   | PSPN     | REG1A   | RTN4R   |
| NPY   | OCSTAMP | OR8D2  | PAQR9    | PDCD1L2 | PLA2G2E  | PRB2    | PTAFR    | REG1B   | RTN4R   |
| NPY1R | ODAM    | OR8G1  | PARD6A   | PDCD6IP | PLA2G2E  | PRB3    | PTAFR    | REG3A   | RTN4RL1 |
| NPY2R | ODAPH   | OR8U8  | PARM1    | PDGFA   | PLA2G2F  | PRCD    | PTCH1    | REG3A   | RTN4RL2 |
| NPY4R | OGN     | OR9G1  | PATE1    | PDGFB   | PLA2G3   | PRELP   | PTCH1    | REG3G   | RTP1    |
| NPY5R | OIT3    | ORAI1  | PATE2    | PDGFB   | PLA2G3   | PRELP   | PTCH2    | REG4    | RTP1    |
| NPY6R | OLFM1   | ORAI2  | PATE3    | PDGFC   | PLA2G3   | PRF1    | PTCRA    | REG4    | RTP2    |
| NRAC  | OLFM3   | ORAI3  | PCDH1    | PDGFD   | PLA2G5   | PRF1    | PTCRA    | RELL1   | RXFP1   |
| NRCAM | OLFM4   | ORM1   | PCDH1    | PDGFRA  | PLA2G5   | PRG2    | PTEN     | RELL2   | RXFP1   |
| NRCAM | OLFM4   | ORM2   | PCDH10   | PDGFRA  | PLA2G7   | PRIMA1  | PTGDR    | RELT    | RXFP1   |
| NRG1  | OLFML1  | OSCAR  | PCDH10   | PDGFRA  | PLA2R1   | PRKCA   | PTGDR2   | REN     | RXFP2   |
| NRG1  | OLFML2A | OSCAR  | PCDH11Y  | PDGFRB  | PLA2R1   | PRKCH   | PTGDS    | RESP18  | RXFP3   |
| NRG1  | OLFML2B | OSCAR  | PCDH17   | PDGFRL  | PLAC1    | PRL     | PTGER1   | RET     | RXFP4   |
| NRG1  | OLR1    | OSCAR  | PCDH18   | PDIA6   | PLAC9    | PRL     | PTGER2   | RET     | RYK     |
| NRG1  | OLR1    | OSCAR  | PCDH20   | PDLIM5  | PLAT     | PRLH    | PTGER3   | RETN    | RYK     |
| NRG1  | OMD     | OSCP1  | PCDH8    | PDLIM5  | PLAU     | PRLHR   | PTGER3   | RETNLB  | S100A12 |
| NRG1  | OMG     | OSM    | PCDH8    | PDLIM5  | PLAU     | PRLR    | PTGER3   | RFTN2   | S100A13 |
| NRG1  | OOSP2   | OSMR   | PCDH9    | PDLIM5  | PLAUR    | PRLR    | PTGER3   | RGMA    | S100A7  |
| NRG2  | OPALIN  | OSMR   | PCDHA1   | PDLIM5  | PLAUR    | PRMT8   | PTGER4   | RGMB    | S100A7  |
| NRG2  | OPN1LW  | OSTC   | PCDHA1   | PDPN    | PLAUR    | PRMT8   | PTGFR    | RGMB    | S100A8  |
| NRG2  | OPN1LW  | OSTN   | PCDHA10  | PDPN    | PLAUR    | PRND    | PTGFRN   | RGR     | S100A8  |
| NRG2  | OPN1MW  | OTOA   | PCDHA10  | PDPN    | PLB1     | PRNP    | PTGIR    | RGS9BP  | S100A9  |
| NRG3  | OPN1SW  | OTOL1  | PCDHA10  | PDPN    | PLB1     | PROC    | PTH      | RHAG    | S100A9  |
| NRG3  | OPN1SW  | OTOP1  | PCDHA13  | PDYN    | PLB1     | PROCR   | PTH1R    | RHBDD1  | S1PR1   |
| NRG4  | OPN1SW  | OTOP1  | PCDHA2   | PDYN    | PLGLB2   | PROK1   | PTH2     | RHBDD2  | S1PR2   |
| NRN1  | OPN3    | OTOR   | PCDHA2   | PEAR1   | PLGRKT   | PROK2   | PTH2R    | RHBDD2  | S1PR3   |
| NRN1L | OPN4    | OTOS   | PCDHA3   | PECAM1  | PLP      | PROKR1  | PTHLH    | RHBDL2  | S1PR4   |
| NRP1  | OPN5    | OVCH1  | PCDHA4   | PERP    | PLP1     | PROKR2  | PTK7     | RHBG    | S1PR5   |
| NRP1  | OPRD1   | OXR1   | PCDHA6   | PF4     | PLP2     | PROM1   | PTK7     | RHCE    | S1PR5   |
| NRP1  | OPRK1   | OXGR1  | PCDHA6   | PF4V1   | DLPP1    | PROM1   | PTN      | RHCG    | S1PR5   |
| NRP1  | OPRL1   | OXT    | PCDHA6   | PGA4    | PLPP2    | PROM2   | PTPRA    | RHD     | SA1     |
| NRP2  | OPRM1   | OXT    | PCDHA7   | PGA5    | PLPP3    | PROZ    | PTPRB    | RHD     | SA2     |
| NRP2  | OPRPN   | P2RX1  | PCDHA7   | PGC     | PLPP7    | PRR27   | PTPRC    | RHEB    | SA4     |
| NRP2  | OPTC    | P2RX2  | PCDHA8   | PGF     | PLSCR1   | PRR4    | PTPRCAP  | RHO     | SAMD1   |
| NRP2  | OR10G3  | P2RX2  | PCDHA9   | PGLYRP1 | PLSCR1   | PRR7    | PTPRD    | RHO     | SBSN    |
| NRP2  | OR10T2  | P2RX3  | PCDHAC2  | PGLYRP2 | PLSCR2   | PRR7    | PTPRE    | RLN1    | SBSPON  |
| NRROS | OR10W1  | P2RX4  | PCDHB1   | PGLYRP2 | PLSCR2   | PRRG1   | PTPRF    | RLN2    | SCAMP5  |
| NRSN2 | OR11A1  | P2RX4  | PCDHB10  | PGLYRP3 | PLSCR3   | PRRG2   | PTPRG    | RLN3    | SCAMP5  |
| NRTN  | OR11G2  | P2RX5  | PCDHB11  | PGLYRP4 | PLSCR4   | PRRG3   | PTPRH    | RNASE1  | SCARA3  |
| NRXN1 | OR13C4  | P2RX5  | PCDHB12  | PHEX    | PLTP     | PRRG4   | PTPRJ    | RNASE1  | SCARA3  |
| NRXN3 | OR13C8  | P2RX5  | PCDHB13  | PHEX    | PLVAP    | PRRT1   | PTPRJ    | RNASE10 | SCARA5  |
| NRXN3 | OR13C9  | P2RX6  | PCDHB14  | PI15    | PLXDC1   | PRRT1   | PTPRK    | RNASE11 | SCARA5  |
| NRXN3 | OR14A16 | P2RX6  | PCDHB15  | PI16    | PLXDC2   | PRRT2   | PTPRM    | RNASE12 | SCARB1  |
| NSG1  | OR1D5   | P2RX7  | PCDHB16  | PI16    | PLXDC2   | PRRT3   | PTPRN    | RNASE13 | SCARB1  |
| NT5E  | OR1E1   | P2RX7  | PCDHB2   | PI16    | PLXNA1   | PRSS1   | PTPRN    | RNASE3  | SCARF1  |
| NT5E  | OR1G1   | P2RY1  | PCDHB3   | PI3     | PLXNA1   | PRSS2   | PTPRN2   | RNASE4  | SCG2    |
| NT5E  | OR1J2   | P2RY10 | PCDHB4   | PI3     | PLXNA2   | PRSS21  | PTPRO    | RNASE6  | SCG3    |
| NTF3  | OR1J4   | P2RY11 | PCDHB5   | PLANP   | PLXNA4   | PRSS22  | PTPRO    | RNASE6  | SCG5    |
| NTF4  | OR1N1   | P2RY12 | PCDHB6   | PIBF1   | PLXNA4   | PRSS22  | PTPRO    | RNASE7  | SCG5    |
| NTM   | OR2C3   | P2RY12 | PCDHB7   | PIEZO1  | PLXNB1   | PRSS23  | PTPRR    | RNASE8  | SCG5    |
| NTM   | OR2L13  | P2RY12 | PCDHB8   | PIEZO1  | PLXNB2   | PRSS27  | PTPRS    | RNASE9  | SCGB1A1 |
| NTN1  | OR2M4   | P2RY12 | PCDHB9   | PIGBOS1 | PLXNC1   | PRSS33  | PTPRS    | RNASET2 | SCGB1A1 |
| NTN3  | OR2T1   | P2RY13 | PCDHGA10 | PIGF    | PLXND1   | PRSS35  | PTPRT    | RNF130  | SCGB1C1 |
| NTN4  | OR2T35  | P2RY13 | PCDHGA11 | PIGO    | PM2D1    | PRSS36  | PTPRT    | RNF130  | SCGB1C2 |
| NTN4  | OR3A2   | P2RY14 | PCDHGA12 | PIGP    | PMCH     | PRSS37  | PTTG1IP  | RNF150  | SCGB1D1 |
| NTN5  | OR3A3   | P2RY14 | PCDHGA2  | PIGQ    | PMP22    | PRSS38  | PTX3     | RNF150  | SCGB1D2 |
| NTNG1 | OR4C45  | P2RY2  | PCDHGA3  | PIGR    | PNLDC1   | PRSS42  | PTX4     | RNF180  | SCGB1D4 |
| NTNG1 | OR4D2   | P2RY2  | PCDHGA4  | PIGU    | PNLIP    | PRSS48  | PVR      | RNF180  | SCGB2B2 |
| NTNG2 | OR4E2   | P2RY2  | PCDHGA5  | PIGZ    | PNLIPRP1 | PRSS53  | PVR      | RNF215  | SCGB3A1 |
| NTNG2 | OR4N2   | P2RY4  | PCDHGA6  | PIK3IP1 | PNLIPRP3 | PRSS54  | PVRIG    | RNF43   | SCGB3A2 |
| NTRK1 | OR4Q3   | P2RY4  | PCDHGA8  | PILRA   | PNOC     | PRSS55  | PVRL3    | RNF43   | SCGN    |
| NTRK1 | OR4S2   | P2RY6  | PCDHGA8  | PILRA   | PNPLA2   | PRSS57  | PXDN     | RNF22   | SCGN    |
| NTRK1 | OR51A2  | P2RY6  | PCDHGA9  | PILRA   | PODN     | PRSS58  | PXK      | RNF22   | SCIMP   |
| NTRK2 | OR51B6  | P2RY6  | PCDHGB1  | PILRA   | PODNL1   | PRSS8   | PYM1     | RNLS    | SCN10A  |
| NTRK2 | OR51E1  | P2RY6  | PCDHGB2  | PILRB   | PODXL    | PRTN3   | PYY      | RNPEP   | SCN1B   |
| NTRK3 | OR51L1  | P2RY8  | PCDHGB3  | PILRB   | PODXL    | PSAP    | QPCT     | ROBO2   | SCN1B   |
| NTRK3 | OR51V1  | P2RY8  | PCDHGB4  | PILRB   | PODXL2   | PSAP    | QRF      | ROBO3   | SCN1B   |
| NTRK3 | OR52A1  | P2RY8  | PCDHGB6  | PIP     | POMC     | PSAPL1  | QRF      | ROBO3   | SCN1B   |
| NTS   | OR52A5  | P4HB   | PCDHGB6  | PKD1L2  | PON1     | PSCA    | QRFPR    | ROBO4   | SCN2B   |
| NTSR1 | OR52I1  | PAEP   | PCDHGB7  | PKD1L2  | PON3     | PSEN1   | QRFPR    | ROR1    | SCN4A   |
| NTSR2 | OR52M1  | PAG1   | PCDHGC3  | PKD1L2  | POPDC2   | PSEN2   | QSOX1    | ROR1    | SCN4B   |
| NTSR2 | OR5AC2  | PAG1   | PCDHGC3  | PKD2    | POPDC3   | PSENEN  | R3HDM    | ROR2    | SCN4B   |
| NUCB1 | OR5D14  | PANX1  | PCDHGC3  | PKD2L1  | PORCN    | PSG1    | RAET1E   | ROS1    | SCN5A   |
| NXPE1 | OR5D16  | PANX1  | PCDHGC4  | PKD2L2  | PORCN    | PSG11   | RAET1E   | RPSA    | SCN5A   |
| NXPE3 | OR5H1   | PANX2  | PCDHGC5  | PKD2L2  | POTED    | PSG2    | RAET1G   | RRAS2   | SCN9A   |
| NXPE4 | OR5J2   | PANX2  | PCOLCE   | PKDCC   | PPBP     | PSG3    | RAET1G   | RRH     | SCN9A   |

|           |          |          |          |         |          |          |          |         |          |
|-----------|----------|----------|----------|---------|----------|----------|----------|---------|----------|
| SCNN1A    | SERPINI2 | SLC13A1  | SLC26A5  | SLC3A2  | SLC6A7   | SORT1    | STX1A    | TBXA2R  | TM4SF4   |
| SCNN1B    | SEZ6     | SLC13A2  | SLC26A6  | SLC40A1 | SLC6A8   | SOST     | STX3     | TCN2    | TM4SF5   |
| SCNN1D    | SEZ6L    | SLC13A2  | SLC26A7  | SLC6A9  | SLC6A9   | SOSTDC1  | STX4     | TCTA    | TM7SF3   |
| SCNN1D    | SEZ6L2   | SLC13A3  | SLC26A8  | SLC41A1 | SLC6A9   | SPA17    | STXBP3   | TCTN1   | TM9SF2   |
| SCNN1G    | SFN      | SLC13A3  | SLC27A1  | SLC41A2 | SLC7A1   | SPACA1   | STYK1    | TCTN2   | TMC1     |
| SCPEP1    | SFRP1    | SLC13A4  | SLC27A3  | SLC41A2 | SLC7A10  | SPACA3   | SUCNR1   | TCTN2   | TMC2     |
| SCRG1     | SFRP2    | SLC13A5  | SLC27A4  | SLC41A3 | SLC7A11  | SPACA4   | SULF1    | TCTN3   | TMC3     |
| SCRG1     | SFRP2    | SLC14A1  | SLC27A6  | SLC41A3 | SLC7A13  | SPACA6   | SUSD1    | TDGF1   | TMC4     |
| SCRG1     | SFRP2    | SLC15A1  | SLC28A1  | SLC43A1 | SLC7A2   | SPACA7   | SUSD2    | TDGF1   | TMC5     |
| SCT       | SFRP4    | SLC15A2  | SLC28A1  | SLC43A2 | SLC7A2   | SPAG11B  | SUSD3    | TECTB   | TMC5     |
| SCT       | SFRP4    | SLC15A3  | SLC28A1  | SLC43A2 | SLC7A3   | SPAM1    | SUSD4    | TECTB   | TMC7     |
| SCTR      | SFRP5    | SLC16A1  | SLC28A2  | SLC43A3 | SLC7A5   | SPARCL1  | SUSD4    | TEK     | TMC7     |
| SCUBE1    | SFTA2    | SLC16A1  | SLC28A3  | SLC44A2 | SLC7A6   | SPATA6   | SUSD4    | TEPP    | TMC7     |
| SCUBE1    | SFTA3    | SLC16A10 | SLC29A1  | SLC44A2 | SLC7A7   | SPCS1    | SUSD5    | TEX101  | TMED1    |
| SCUBE2    | SFTPA1   | SLC16A10 | SLC29A2  | SLC44A3 | SLC7A8   | SPG11    | SUSD6    | TEX101  | TMEFF1   |
| SDC1      | SFTPA2   | SLC16A14 | SLC29A3  | SLC44A3 | SLC7A8   | SPG11    | SV2A     | TEX264  | TMEFF2   |
| SDC1      | SFTPB    | SLC16A3  | SLC29A4  | SLC44A4 | SLC7A9   | SPG11    | SV2A     | TEX29   | TMEFF2   |
| SDC2      | SFTPC    | SLC16A4  | SLC2A1   | SLC44A4 | SLC8A1   | SPINK1   | SV2B     | TF      | TMEM106A |
| SDC3      | SFTPC    | SLC16A4  | SLC2A10  | SLC44A5 | SLC8A2   | SPINK1   | SV2C     | TF1     | TMEM108  |
| SDC4      | SFTPD    | SLC16A5  | SLC2A11  | SLC45A2 | SLC8A3   | SPINK13  | SVBP     | TF2     | TMEM120A |
| SDC4      | SGCA     | SLC16A6  | SLC2A12  | SLC45A2 | SLC8A3   | SPINK14  | SYNDIG1  | TFPI    | TMEM123  |
| SDCBP     | SGCB     | SLC16A7  | SLC2A13  | SLC45A3 | SLC8B1   | SPINK2   | SYNDIG1  | TFPI    | TMEM130  |
| SDCBP     | SGCD     | SLC16A8  | SLC2A2   | SLC46A1 | SLC9A1   | SPINK2   | SYNDIG1L | TFPI    | TMEM130  |
| SDCBP     | SGCD     | SLC17A3  | SLC2A2   | SLC46A1 | SLC9A1   | SPINK4   | SYNGR2   | TFPI2   | TMEM130  |
| SDF2      | SGCE     | SLC17A4  | SLC2A3   | SLC46A2 | SLC9A2   | SPINK5   | SYNGR4   | TFPI2   | TMEM130  |
| SDF2      | SGCG     | SLC17A4  | SLC2A4   | SLC46A3 | SLC9A3   | SPINK6   | SYT14    | TFR2    | TMEM132A |
| SDK1      | SGCZ     | SLC17A7  | SLC2A5   | SLC46A3 | SLC9A3R1 | SPINK7   | SYT14    | TFR2    | TMEM132B |
| SEC23B    | SGCZ     | SLC18A1  | SLC2A5   | SLC47A1 | SLC9A5   | SPINK8   | SYT15    | TFRC    | TMEM132D |
| SEC61G    | SHBG     | SLC18A2  | SLC2A6   | SLC47A1 | SLC9A6   | SPINK9   | SYT15    | TFRC    | TMEM134  |
| SECTM1    | SHSA2    | SLC18B1  | SLC2A7   | SLC47A2 | SLC9A7   | SPINT1   | SYT15    | TGFA    | TMEM139  |
| SECTM1    | SHSA4    | SLC19A1  | SLC2A8   | SLC4A1  | SLC9B1   | SPINT1   | SYT8     | TGFA    | TMEM140  |
| SELE      | SHSA5    | SLC19A1  | SLC2A9   | SLC4A10 | SLC01A2  | SPINT1   | TAAR1    | TGFA    | TMEM150A |
| SELENOP   | SHSAL1   | SLC19A2  | SLC2A9   | SLC4A2  | SLC01A2  | SPINT2   | TAAR2    | TGFB2   | TMEM150A |
| SELL      | SIDT1    | SLC19A3  | SLC2A9   | SLC4A2  | SLC01A2  | SPINT3   | TAAR2    | TGFB3   | TMEM150A |
| SELL      | SIGHR    | SLC1A1   | SLC30A1  | SLC4A2  | SLC01B1  | SPINT4   | TAAR3P   | TGFB1   | TMEM154  |
| SELP      | SIGLEC1  | SLC1A2   | SLC30A10 | SLC4A4  | SLC01B3  | SPN      | TAAR5    | TGFB1   | TMEM155  |
| SELP      | SIGLEC10 | SLC1A3   | SLC30A5  | SLC4A7  | SLC01B7  | SPNS3    | TAAR6    | TGFB1   | TMEM161A |
| SELPLG    | SIGLEC10 | SLC1A4   | SLC30A5  | SLC4A8  | SLC01C1  | SPOCK1   | TAAR8    | TGFB1   | TMEM163  |
| SEMA3A    | SIGLEC11 | SLC1A5   | SLC30A6  | SLC4A8  | SLC02A1  | SPOCK3   | TAAR9    | TGFB2   | TMEM167A |
| SEMA3B    | SIGLEC11 | SLC1A6   | SLC30A7  | SLC50A1 | SLC02B1  | SPON1    | TAC1     | TGFB2   | TMEM167B |
| SEMA3B    | SIGLEC12 | SLC1A6   | SLC30A8  | Slc51a  | SLC03A1  | SPON2    | TAC1     | TGFB3   | TMEM169  |
| SEMA3C    | SIGLEC14 | SLC1A7   | SLC30A8  | SLC51A  | SLC03A1  | SPPI     | TAC3     | TGFB3   | TMEM173  |
| SEMA3E    | SIGLEC15 | SLC1A7   | SLC31A1  | SLC51B  | SLC04A1  | SPRED1   | TAC4     | TGFB3L  | TMEM178A |
| SEMA3F    | SIGLEC15 | SLC20A2  | SLC31A1  | SLC51B  | SLC04C1  | SPRED1   | TACR1    | TGM2    | TMEM182  |
| SEMA4A    | SIGLEC5  | SLC22A1  | SLC31A2  | SLC52A1 | SLC05A1  | SPX      | TACR1    | TGM2    | TMEM182  |
| SEMA4C    | SIGLEC6  | SLC22A1  | SLC33A1  | SLC52A3 | SLC05A1  | SRGN     | TACR2    | TGOLN2  | TMEM184B |
| SEMA4D    | SIGLEC6  | SLC22A10 | SLC34A1  | SLC5A1  | SLC06A1  | SRGN     | TACR3    | TGOLN2  | TMEM190  |
| SEMA4F    | SIGLEC7  | SLC22A11 | SLC34A2  | SLC5A1  | SLC06A1  | SRI      | TACSTD2  | THBD    | TMEM198  |
| SEMA4G    | SIGLEC8  | SLC22A12 | SLC34A3  | SLC5A10 | SLIT1    | SRPX     | TAGLN2   | THEM6   | TMEM198  |
| SEMA5A    | SIGLEC9  | SLC22A12 | SLC35D2  | SLC5A10 | SLIT3    | SRPX2    | TAOK3    | THNSL2  | TMEM200A |
| SEMA6A    | SIGLECL1 | SLC22A13 | SLC35F2  | SLC5A11 | SLITRK1  | SSC4D    | TAPBPL   | THOP1   | TMEM204  |
| SEMA6C    | SIGMAR1  | SLC22A14 | SLC35G2  | SLC5A12 | SLITRK1  | SSPN     | TAPT1    | THPO    | TMEM205  |
| SEMA6D    | SIRPA    | SLC22A16 | SLC36A1  | SLC5A12 | SLITRK2  | SSPN     | TARM1    | THSD1   | TMEM206  |
| SEMA6D    | SIRPA    | SLC22A17 | SLC36A2  | SLC5A2  | SLITRK3  | SST      | TAS1R1   | THSD4   | TMEM213  |
| SEMA7A    | SIRPA    | SLC22A18 | SLC36A2  | SLC5A3  | SLITRK4  | SSTR1    | TAS1R1   | THY1    | TMEM222  |
| SEMG1     | SIRPB1   | SLC22A2  | SLC36A3  | SLC5A4  | SLITRK5  | SSTR1    | TAS1R2   | THY1    | TMEM222  |
| SEMG2     | SIRPB1   | SLC22A23 | SLC36A4  | SLC5A5  | SLITRK6  | SSTR2    | TAS1R3   | TICAM2  | TMEM222  |
| SEPW1     | SIRPB1   | SLC22A23 | SLC38A1  | SLC5A6  | SLMAP    | SSTR3    | TAS2R1   | TIE1    | TMEM229B |
| SERBP1    | SIRPB2   | SLC22A25 | SLC38A2  | SLC5A7  | SLM1     | SSTR4    | TAS2R10  | TIGT    | TMEM25   |
| SERBP1    | SIRPD    | SLC22A4  | SLC38A2  | SLC5A8  | SLURP1   | SSTR5    | TAS2R13  | TIMD4   | TMEM25   |
| SERINC1   | SIRPD    | SLC22A5  | SLC38A3  | SLC5A9  | SLURP2   | ST14     | TAS2R14  | TIMP1   | TMEM25   |
| SERINC3   | SIRPG    | SLC22A6  | SLC38A4  | SLC6A1  | SMAGP    | ST3GAL1  | TAS2R16  | TIMP1   | TMEM256  |
| SERP1     | SIT1     | SLC22A7  | SLC38A5  | SLC6A11 | SMAGP    | ST3GAL2  | TAS2R19  | TIMP2   | TMEM27   |
| SERPINA1  | SLAMF1   | SLC22A8  | SLC38A6  | SLC6A11 | SMAGP    | ST3GAL3  | TAS2R19  | TIMP3   | TMEM39A  |
| SERPINA10 | SLAMF1   | SLC22A9  | SLC38A6  | SLC6A12 | SMIM1    | ST6GAL1  | TAS2R20  | TIMP3   | TMEM39A  |
| SERPINA11 | SLAMF1   | SLC22A9  | SLC38A7  | SLC6A13 | SMIM23   | ST6GAL1  | TAS2R20  | TIMP4   | TMEM39A  |
| SERPINA12 | SLAMF6   | SLC22A9  | SLC38A7  | SLC6A13 | SMIM29   | ST6GALNA | TAS2R3   | TIMP4   | TMEM44   |
| SERPINA3  | SLAMF7   | SLC23A1  | SLC39A1  | SLC6A14 | SMIM7    | C6       | TAS2R30  | TINAG   | TMEM47   |
| SERPINA5  | SLAMF7   | SLC23A1  | SLC39A12 | SLC6A14 | SMO      | ST7      | TAS2R30  | TINAGL1 | TMEM5    |
| SERPINA5  | SLAMF7   | SLC23A2  | SLC39A14 | SLC6A15 | SMOC2    | STARD3   | TAS2R31  | TIRAP   | TMEM50A  |
| SERPINA6  | SLAMF8   | SLC23A2  | SLC39A2  | SLC6A15 | SMPD1    | STARD3   | TAS2R38  | TL1     | TMEM59   |
| SERPINA6  | SLAMF9   | SLC23A2  | SLC39A3  | SLC6A15 | SMPD1    | STARD3NL | TAS2R39  | TLR1    | TMEM63A  |
| SERPINA9  | SLC10A1  | SLC23A3  | SLC39A3  | SLC6A16 | SMPD2    | STATH    | TAS2R4   | TLR10   | TMEM63A  |
| SERPINA9  | SLC10A2  | SLC24A3  | SLC39A4  | SLC6A16 | SMPD3    | STBD1    | TAS2R40  | TLR2    | TMEM65   |
| SERPINA2  | SLC10A4  | SLC24A4  | SLC39A4  | SLC6A17 | SMPDL3B  | STC2     | TAS2R41  | TLR3    | TMEM67   |
| SERPINA2  | SLC10A4  | SLC24A5  | SLC39A5  | SLC6A18 | SMR3A    | STEAP1   | TAS2R42  | TLR4    | TMEM79   |
| SERPINA5  | SLC10A5  | SLC26A1  | SLC39A5  | SLC6A19 | SMR3B    | STEAP1B  | TAS2R43  | TLR5    | TMEM79   |
| SERPINA5  | SLC10A6  | SLC26A11 | SLC39A6  | SLC6A2  | SNAP23   | STEAP2   | TAS2R45  | TLR6    | TMEM81   |
| SERPINC1  | SLC11A1  | SLC26A11 | SLC39A8  | SLC6A20 | SNCA     | STEAP4   | TAS2R46  | TLR7    | TMEM86A  |
| SERPINC1  | SLC11A2  | SLC26A2  | SLC39A8  | SLC6A3  | SNCA     | STIM1    | TAS2R5   | TLR8    | TMEM86B  |
| SERPINE1  | SLC12A1  | SLC26A3  | SLC39A9  | SLC6A4  | SNORC    | STIM2    | TAS2R50  | TLR9    | TMEM86B  |
| SERPINE2  | SLC12A2  | SLC26A4  | SLC39A9  | SLC6A4  | SOD3     | STOM     | TAS2R60  | TM2D1   | TMEM88   |
| SERPINE3  | SLC12A3  | SLC26A5  | SLC3A1   | SLC6A5  | SORBS1   | STOML1   | TAS2R7   | TM4SF1  | TMEM89   |
| SERPINF1  | SLC12A6  | SLC26A5  | SLC3A2   | SLC6A6  | SORBS1   | STOML3   | TAS2R7   | TM4SF1  | TMEM8A   |
| SERPINF2  | SLC12A8  | SLC26A5  | SLC3A2   | SLC6A6  | SORD     | STRA6    | TAS2R8   | TM4SF18 | TMEM8B   |
| SERPINF2  | SLC12A9  | SLC26A5  | SLC3A2   | SLC6A7  | SORD     | STX1A    | TAS2R9   | TM4SF19 | TMEM9    |

|           |           |          |        |         |         |        |         |         |         |
|-----------|-----------|----------|--------|---------|---------|--------|---------|---------|---------|
| TMEM91    | TNFRSF10A | TNFSF12  | TREM1  | TRPV5   | TULP3   | UPK3BL | VNN3    | WFIKKN2 | XKR8    |
| TMEM92    | TNFRSF10B | TNFSF12  | TREM1  | TRPV6   | TUSC5   | UTS2   | VOPP1   | WIF1    | XKRX    |
| TMEM95    | TNFRSF10C | TNFSF12  | TREM2  | TSHB    | TWSG1   | UTS2   | VPREB1  | WISP1   | XPNPEP2 |
| TMEM97    | TNFRSF10D | TNFSF13  | TREM2  | TSHR    | TXN     | UTS2B  | VSIG1   | WISP2   | XPR1    |
| TMIE      | TNFRSF11A | TNFSF13  | TREM2  | TSKU    | TXNDC15 | UTS2R  | VSIG10  | WISP3   | YBX1    |
| TMIGD1    | TNFRSF12A | TNFSF13B | TREML1 | TSLP    | TXNDC15 | VANGL1 | VSIG2   | WNT1    | YIF1B   |
| TMIGD2    | TNFRSF13B | TNFSF13B | TREML2 | TSPAN1  | TXNDC16 | VANGL2 | VSIG4   | WNT10A  | YIF1B   |
| TMIGD3    | TNFRSF13B | TNFSF14  | TREML2 | TSPAN12 | TYRO3   | VASH1  | VSIG8   | WNT10B  | YIPF3   |
| TMPRSS11  | TNFRSF13B | TNFSF14  | TREML4 | TSPAN13 | TYROBP  | VASH2  | VSTM1   | WNT10B  | YKT6    |
| A         | TNFRSF13C | TNFSF15  | TRH    | TSPAN14 | TYROBP  | VASN   | VSTM1   | WNT11   | ZACN    |
| TMPRSS11  | TNFRSF14  | TNFSF15  | TRHDE  | TSPAN15 | UBAC1   | VASN   | VSTM2A  | WNT16   | ZACN    |
| A         | TNFRSF14  | TNFSF18  | TRHR   | TSPAN16 | UBAC2   | VASP   | VSTM2B  | WNT2    | ZDHHC3  |
| TMPRSS11B | TNFRSF17  | TNFSF18  | TRIL   | TSPAN16 | UBAC2   | VCAM1  | VSTM4   | WNT2B   | ZDHHC5  |
| TMPRSS11  | TNFRSF18  | TNFSF4   | TRIM72 | TSPAN18 | UBE2B   | VCL    | VSTM5   | WNT3A   | ZDHHC5  |
| D         | TNFRSF18  | TNFSF8   | TRO    | TSPAN19 | UBL3    | VDAC1  | VTCN1   | WNT3A   | ZFYVE27 |
| TMPRSS11  | TNFRSF18  | TNFSF9   | TRPA1  | TSPAN2  | UCMA    | VEGFA  | VTCN1   | WNT4    | ZFYVE27 |
| D         | TNFRSF18  | TNN      | TRPA1  | TSPAN3  | UCN     | VEGFA  | VTCN1   | WNT4    | ZG16    |
| TMPRSS11E | TNFRSF19  | TOR2A    | TRPC1  | TSPAN31 | UCN2    | VEGFB  | VTI1A   | WNT5A   | ZG16    |
| TMPRSS11E | TNFRSF19  | TP53I11  | TRPC4  | TSPAN32 | UGT2A1  | VEGFB  | VTN     | WNT5A   | ZG16B   |
| TMPRSS12  | TNFRSF1A  | TP53I13  | TRPC5  | TSPAN32 | UGT2A3  | VEGFD  | VWA1    | WNT5B   | ZMYND19 |
| TMPRSS13  | TNFRSF1B  | TPBG     | TRPC6  | TSPAN33 | UGT3A1  | VIP    | VWC2    | WNT7A   | ZNRF3   |
| TMPRSS13  | TNFRSF1B  | TPCN1    | TRPC7  | TSPAN33 | UGT3A1  | VIP    | VWC2L   | WNT7B   | ZP1     |
| TMPRSS15  | TNFRSF21  | TPCN1    | TRPM1  | TSPAN4  | UGT3A2  | VIPR1  | VWF     | WNT7B   | ZP1     |
| TMPRSS2   | TNFRSF25  | TPCN1    | TRPM2  | TSPAN4  | ULBP1   | VIPR1  | WFDC1   | WNT8A   | ZP2     |
| TMPRSS2   | TNFRSF25  | TPCN2    | TRPM3  | TSPAN5  | ULBP2   | VIPR2  | WFDC1   | WNT8B   | ZP3     |
| TMPRSS3   | TNFRSF25  | TPO      | TRPM3  | TSPAN6  | ULBP2   | VIPR2  | WFDC10A | WNT9A   | ZP3     |
| TMPRSS3   | TNFRSF25  | TP5AB1   | TRPM5  | TSPAN7  | ULBP2   | VLDLR  | WFDC10B | WNT9A   | ZP3     |
| TMPRSS4   | TNFRSF25  | TPSB2    | TRPM5  | TSPAN8  | ULBP3   | VLDLR  | WFDC11  | WNT9A   | ZP4     |
| TMPRSS4   | TNFRSF25  | TPSB2    | TRPM5  | TSPAN9  | UMOD    | VMO1   | WFDC11  | WNT9B   | ZP4     |
| TMPRSS5   | TNFRSF25  | TPSD1    | TRPM6  | TTR     | UMODL1  | VMP1   | WFDC12  | WNT9B   | ZPBP2   |
| TMPRSS6   | TNFRSF4   | TRABD2A  | TRPM7  | TTYH1   | UNC5A   | VMP1   | WFDC12  | WWP1    | ZPLD1   |
| TMPRSS6   | TNFRSF6B  | TRAF3IP3 | TRPM8  | TTYH1   | UNC5B   | VN1R1  | WFDC13  | XCL1    | ZPLD1   |
| TMPRSS7   | TNFRSF6B  | TRAF3IP3 | TRPM8  | TTYH2   | UNC5C   | VN1R2  | WFDC2   | XCL1    | ZYX     |
| TMPRSS9   | TNFRSF8   | TRAT1    | TRPV1  | TTYH2   | UNC5CL  | VN1R3  | WFDC2   | XCL2    |         |
| TMX1      | TNFRSF9   | TRAT1    | TRPV2  | TTYH3   | UPK1A   | VN1R3  | WFDC3   | XCR1    |         |
| TMX2      | TNFSF10   | TRAV20   | TRPV3  | TTYH3   | UPK1B   | VN1R4  | WFDC8   | XCR1    |         |
| TMX2      | TNFSF11   | TRDV2    | TRPV4  | TUB     | UPK3A   | VN1R5  | WFDC9   | XG      |         |
| TNF       | TNFSF11   | TREH     | TRPV4  | TUFT1   | UPK3B   | VNN1   | WFDC9   | XG      |         |
| TNF       | TNFSF11   | TREH     | TRPV5  | TULP1   | UPK3B   | VNN2   | WFIKKN1 | XX      |         |
