# Supplementary material for: BT8009; A Nectin-4 Targeting Bicycle Toxin Conjugate for Treatment of Solid Tumors
Source: PubMed Central journal article supplement — Mol Cancer Ther. 2022 Sep 16;21(12):1747–56. doi: 10.1158/1535-7163.MCT-21-0875 (PMC9940631; doi:10.1158/1535-7163.mct-21-0875), 2022-09-16
Supplement: mct-21-0875_supplementary_data_chemical_structures_suppsd.pdf [file mct-21-0875_supplementary_data_chemical_structures_suppsd.pdf]

**BT8009; a Nectin-4 targeting *Bicycle*<sup>®</sup> Toxin Conjugate for treatment of solid tumors.**

**Authors;** Michael Rigby\*, Gavin Bennett\*, Liuhong Chen\*, Gemma E. Mudd\*, Helen E. Harrison\*, Paul J. Beswick\*, Katerine N. Van Rietschoten\*, Sophie M. Watcham\*, Heather S. Scott\*, Amy Brown\*, Peter U. Park<sup>†</sup>, Carly Campbell<sup>†</sup>, Eric Haines, Johanna Lahdenranta<sup>†</sup>, Michael J Skynner\*, Phil Jeffrey\*, Nicholas Keen<sup>†</sup> and Kevin Lee\*

**Supplementary Chemical Structures –**

Supplementary Chemical Structures provides an inventory and structural diagrams of all Bicycle peptides and conjugates described in this publication

**Inventory of supplemental chemical structures**

**BT8009:** Nectin-4 BTC described in this publication.

**BCY8126:** Bicycle Nectin-4 binder used to construct BT8009.

**BCY8234:** Bicycle Nectin-4 binder with sar10 spacer but no toxin conjugation. Relates to Figure 5.

**BCY9565:** Bicycle Nectin 4 binder with biotin tag used for Retrogenix selectivity screening

**BCY8781:** BT8009 analogue in which L-Trps are substituted with D-Trps to provide a non-binding BTC. Related to Figures 1 and 5.

## Bicycle and BTC chemical structures

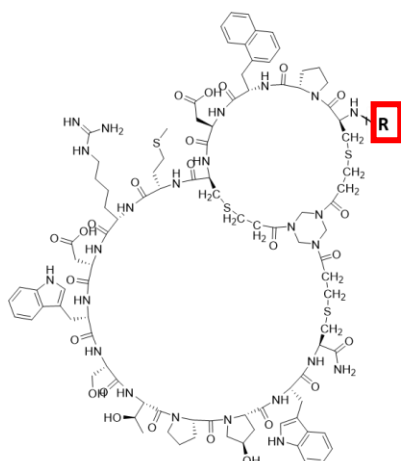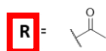

**BCY8126**

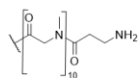

**BCY8234**

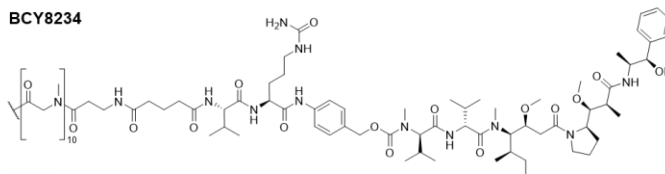

**BT8009**

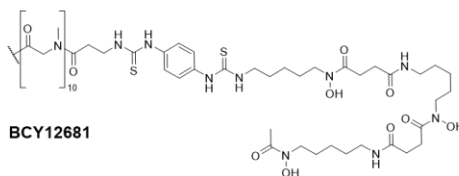

**BCY12681**

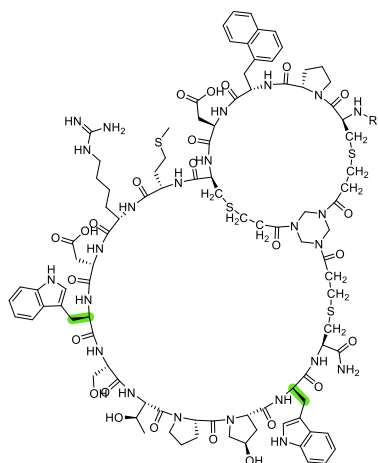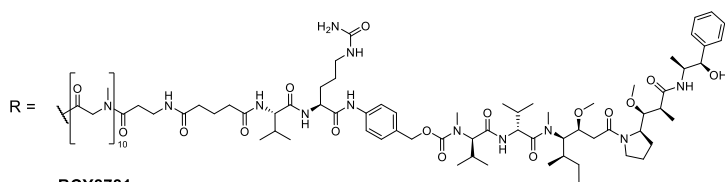

**BCY8781**

BCY8781 is an analogue of BT8009 in which two L-Trp amino acids are substituted with D-Trp (highlighted in green) to provide a non-binding BTC. Related to Figures 1 and 5.
