# Supplementary material for: BT8009; A Nectin-4 Targeting Bicycle Toxin Conjugate for Treatment of Solid Tumors
Source: PubMed Central journal article supplement — Mol Cancer Ther. 2022 Sep 16;21(12):1747–56. doi: 10.1158/1535-7163.MCT-21-0875 (PMC9940631; doi:10.1158/1535-7163.mct-21-0875), 2022-09-16
Supplement: mct-21-0875_supplementary_tables_1-3_supplementary_figures_1-4_suppsf1-4.pdf [file mct-21-0875_supplementary_tables_1-3_supplementary_figures_1-4_suppsf1-4.pdf]

**BT8009; a Nectin-4 targeting *Bicycle*<sup>®</sup> Toxin Conjugate for treatment of solid tumors.**

**Authors;** Michael Rigby\*, Gavin Bennett\*, Liuhong Chen\*, Gemma E. Mudd\*, Helen E. Harrison\*, Paul J. Beswick\*, Katerine N. Van Rietschoten\*, Sophie M. Watcham\*, Heather S. Scott\*, Amy Brown\*, Peter U. Park<sup>†</sup>, Carly Campbell<sup>†</sup>, Eric Haines, Johanna Lahdenranta<sup>†</sup>, Michael J Skynner\*, Phil Jeffrey\*, Nicholas Keen<sup>†</sup> and Kevin Lee\*

**Supplementary Material**

**Supplementary Data**

**Supplementary Table 1: Binding affinities for BT8009 binding to extra-cellular domain of Nectin family members (determined by Surface Plasmon Resonance) and homologies with hNectin-4.**

| Family member | Human                           |                        | NHP                             |                        | Rat                             |                        | Mouse                           |                        |
|---------------|---------------------------------|------------------------|---------------------------------|------------------------|---------------------------------|------------------------|---------------------------------|------------------------|
|               | K <sub>D</sub> (nM)<br>Mean ±SD | hNectin-4 homology (%) | K <sub>D</sub> (nM)<br>Mean ±SD | hNectin-4 homology (%) | K <sub>D</sub> (nM)<br>Mean ±SD | hNectin-4 homology (%) | K <sub>D</sub> (nM)<br>Mean ±SD | hNectin-4 homology (%) |
| Nectin-4      | 2.5±1.3 (n=13)                  | 100                    | 6.3±1.3 (n=7)                   | 99                     | 6.0±1.2 (n=7)                   | 92                     | 2.9±1.1 (n=3)                   | 91                     |
| Nectin-3      | >20000                          | 35                     | -                               | 35                     | -                               | 35                     | -                               | 36                     |
| Nectin-2      | >20000                          | 28                     | -                               | 28                     | -                               | 26                     | -                               | 26                     |
| Nectin-1      | >20000                          | 30                     | -                               | 30                     | -                               | 31                     | -                               | 31                     |
| Necl-1        | >20000                          | 27                     | -                               | 27                     | -                               | 28                     | -                               | 29                     |
| Necl-2        | >20000                          | 28                     | -                               | 28                     | -                               | 28                     | -                               | 28                     |
| Necl-3        | >20000                          | 26                     | -                               | 26                     | -                               | 26.                    | -                               | 26                     |
| Necl-4        | >5000                           | 27                     | -                               | 27                     | -                               | 26                     | -                               | 26                     |
| Necl-5        | >20000                          | 30                     | -                               | 30                     | -                               | 28                     | -                               | 29                     |

Abbreviations: NHP=non-human primate. K<sub>D</sub> = dissociation constant, SD = standard deviation

**Supplementary Table 2: *In vitro* ADME properties of BT8009 in human, NHP, rat and mouse.**

|                                                           | Human | NHP   | Rat   | Mouse   |
|-----------------------------------------------------------|-------|-------|-------|---------|
| Stability in plasma<br>( $t_{1/2}$ , h)                   | >57.8 | >57.8 | 60.7  | 2.3-4.4 |
| Stability in whole blood<br>( $t_{1/2}$ , h)              | 26.1  | 28.3  | 8.5   | 5.0     |
| Stability in hepatocytes<br>( $CL_{int}$ .mL/min/g liver) | <0.02 | <0.02 | <0.03 | -       |
| Stability in microsomes<br>( $CL_{int}$ mL/min/g liver)   | <0.01 | 0.02  | <0.02 | -       |
| Plasma Protein Binding<br>( $f_u$ , p)                    | 0.21  | 0.18  | 0.19  | 0.12    |

Abbreviations:  $CL_{int}$ =intrinsic clearance,  $C_{max}$ =maximum mean plasma concentration,  $f_u$ , p=unbound fraction in plasma, MMAE=monomethyl auristatin E, NHP=non-human primate,  $t_{1/2}$  = terminal half-life.

**Supplementary Table 3:** Calculated PK parameters for BT8009 and MMAE following IV dosing of BT8009 1 mg/kg in mouse, rat, and 1.25 mg/kg in NHP

| Species | PK Parameters                   | BT8009 | MMAE | EV                    |
|---------|---------------------------------|--------|------|-----------------------|
| Mouse   | C <sub>max</sub> (ng/mL)        | -      | 46.6 |                       |
|         | t <sub>1/2</sub> (h)            | 1.0    | 1.3  | 37 <sup>&amp;</sup>   |
|         | Vd <sub>ss</sub> (L/kg)         | 0.25   | --   | 0.08 <sup>&amp;</sup> |
|         | CL (mL/min/kg)                  | 3.5    | --   | 0.02 <sup>&amp;</sup> |
|         | AUC <sub>0-last</sub> (ng.h/mL) | 4489   | 70.7 |                       |
|         | AUC <sub>0-inf</sub> (ng.h/mL)  | 4721   | 73.6 |                       |
| Rat     | C <sub>max</sub> (ng/mL)        | -      | 9.06 |                       |
|         | t <sub>1/2</sub> (h)            | 0.9    | 1.8  | 24-32                 |
|         | Vd <sub>ss</sub> (L/kg)         | 0.44   | --   | 0.04-0.1              |
|         | CL (mL/min/kg)                  | 9.4    | --   | 0.03-0.05             |
|         | AUC <sub>0-last</sub> (ng.h/mL) | 1779   | 15.6 |                       |
|         | AUC <sub>0-inf</sub> (ng.h/mL)  | 1804   | 20.5 |                       |
| NHP     | C <sub>max</sub> (ng/mL)        | 5780*  | 8.3* |                       |
|         | t <sub>1/2</sub> (h)            | 1.7*   |      | 41                    |
|         | Vd <sub>ss</sub> (L/kg)         | 0.39*  | --   | 0.07-0.08             |
|         | CL (mL/min/kg)                  | 4.1*   | --   | 0.02                  |
|         | AUC <sub>0-last</sub> (ng.h/mL) | 4923*  | 23*  |                       |
|         | AUC <sub>0-inf</sub> (ng.h/mL)  | 5041*  |      |                       |

**Abbreviations:** AUC=area under the mean plasma concentration-time curve, CL=clearance, C<sub>max</sub>=maximum mean plasma concentration, MMAE=monomethyl auristatin E, NHP=non-human primate, PK=pharmacokinetic, t<sub>1/2</sub>=terminal half-life, Vd<sub>ss</sub>=volume of distribution at steady state. \*NHP data obtained from TK studies. <sup>&</sup>In ICR SCID mouse. Enfortumab vedotin data from literature.

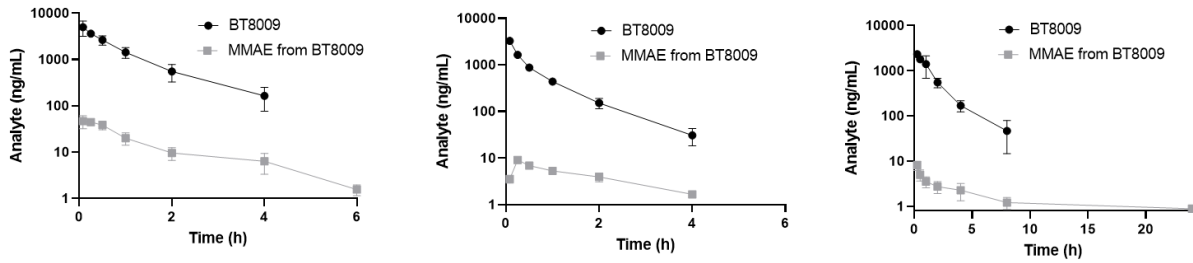

**Supplementary Figure 1:** Plasma concentration-time curves for BT8009 and MMAE following IV dosing of BT8009: (L-R) 1 mg/kg in mouse and rat (n=3, PK data), and 1.25 mg/kg in NHP (n=5, TK data), errors signify standard deviation. Note higher MMAE levels in mouse likely due to Ces1c activity.

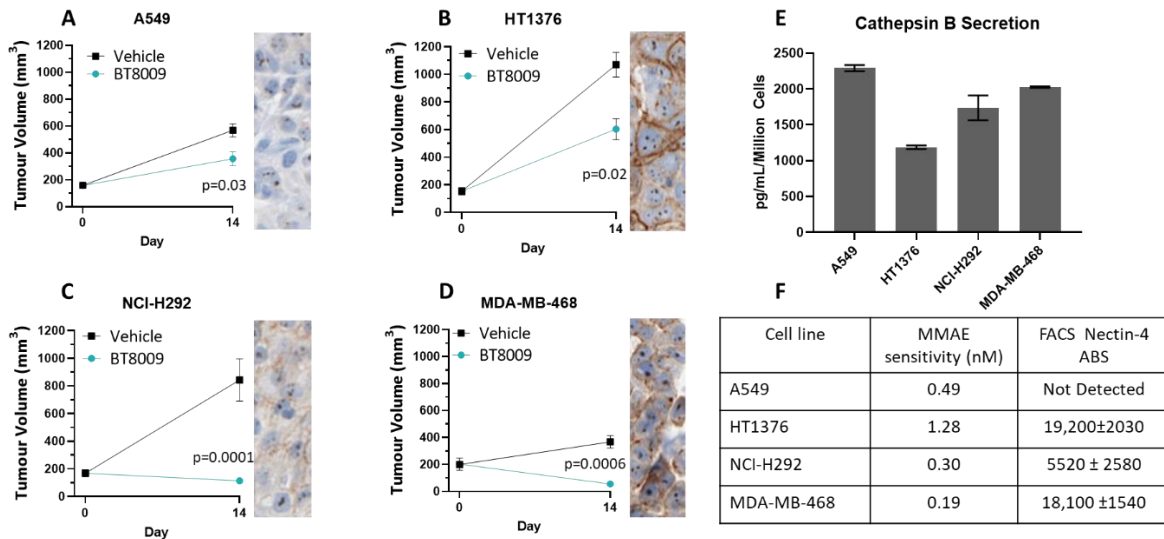

**Supplementary Figure 2; A-D)** Relationship between BT8009 efficacy in CDX models and Nectin-4 expression assessed by IHC, Nectin-4 expression shown by brown staining predominately on cell membrane; **E)** Cathepsin B secretion from cell lines *in vitro*; **F)** *In vitro* sensitivity to MMAAE and extracellular Nectin-4 expression (ABS -antigen binding sites/cell, assessed by FACS) in these cell lines.

Animals were dosed with 3 mg/kg BT8009 or vehicle qw. Error bars indicate SEM of n=3-5 for xenograft studies. Day 14 data was analyzed by unpaired t-test with Welch's correction, comparing drug with vehicle treatment.

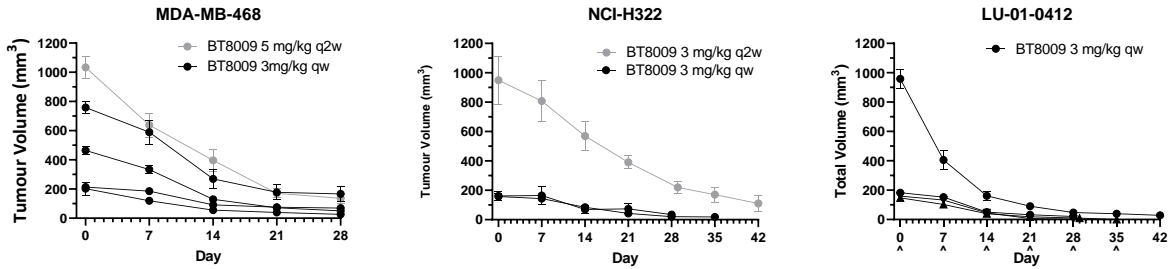

**Supplementary Figure 3; Tumor regression curves in response to BT8009 from multiple studies.** BT8009 delivers rapid tumor regression irrespective of the starting tumor size, indicative of good penetration throughout the tumor. Error bars indicate SEM of n=3-5.

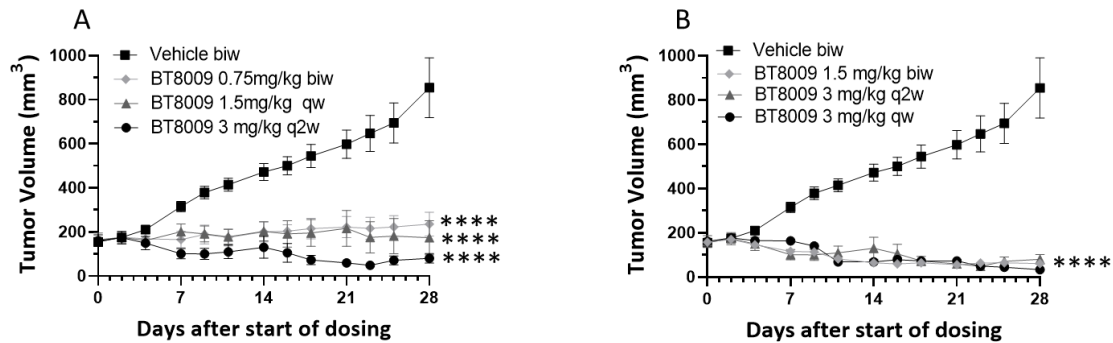

**Supplementary Figure 4; BT8009 shows efficacy in a range of dosing regimens in NCI-H322 xenografts, A) Dose equivalences of 0.75 mg/kg biw, B) Dose response to 1.5 and 3 mg/kg with different dosing intervals show equivalent efficacy.** Tumor volumes are shown as mean +/- standard error of the mean (n=3-5) and statistical analysis performed with Ordinary one-way ANOVA with Tukey's post hoc test for multiple comparisons \*\*\*\* p<0.0001. There were no significant differences between drug treated groups.
